# Supplementary material
Source: publisher site journal article supplement (https://www.spandidos-publications.com/6652/downloadSupplementary)
Supplement: Supplementary file 1 [file downloadSupplementary]

## Sheet: Sheet1
Table SIII. Genes in the HNSCC TCGA dataset.
logFC	AveExpr	t	P.Value	adj.P.Val	B
HMGCS2	-6.2742	-2.309	-11.7827	1.54e-19	2.19e-15	33.8498
ADIPOQ	-6.20903	-2.68014	-11.1779	2.37e-18	1.69e-14	31.2043
ADH1B	-6.65758	-1.66785	-10.8208	1.21e-17	5.74e-14	29.6258
PLIN1	-5.19028	-1.88425	-10.5048	5.17e-17	1.84e-13	28.2206
TGFB1	1.90263	6.89464	10.2746	1.49e-16	3.83e-13	27.1923
GPD1	-5.22388	-0.554001	-10.2575	1.62e-16	3.83e-13	27.1156
GPD1L	-2.45668	3.90057	-10.0428	4.36e-16	8.86e-13	26.1534
SLC27A6	-4.93424	-2.03194	-9.99913	5.34e-16	9.49e-13	25.9571
CRISP3	-8.50683	0.244077	-9.95524	6.54e-16	1.02e-12	25.76
FOXM1	2.51845	5.76378	9.93535	7.18e-16	1.02e-12	25.6706
C9orf152	-4.59222	-2.11806	-9.77947	1.48e-15	1.91e-12	24.9694
NRG2	-4.2596	-1.55951	-9.75019	1.69e-15	2.01e-12	24.8376
CIDEC	-4.43743	-2.81774	-9.6254	3.02e-15	3.3e-12	24.2753
BMP1	1.94752	6.02384	9.57036	3.9e-15	3.96e-12	24.0272
MPC1	-1.75373	3.83945	-9.48065	5.92e-15	5.61e-12	23.6225
ECRG4	-4.4896	-2.26675	-9.4482	6.89e-15	5.84e-12	23.476
PTHLH	4.46972	6.38814	9.44515	6.99e-15	5.84e-12	23.4623
SETMAR	-1.70242	2.48412	-9.39981	8.63e-15	6.81e-12	23.2576
DLK1	-4.99664	-2.74323	-9.35274	1.07e-14	8.03e-12	23.0451
PPP1R1A	-5.0393	-1.82407	-9.24781	1.75e-14	1.19e-11	22.5711
TPX2	2.49076	6.37155	9.24378	1.78e-14	1.19e-11	22.5529
MYBL2	2.67251	5.90132	9.23585	1.85e-14	1.19e-11	22.5171
CEP55	2.57921	5.10593	9.18195	2.38e-14	1.47e-11	22.2735
HOXC6	2.99333	-0.00858321	9.16429	2.58e-14	1.53e-11	22.1937
FAM107A	-4.14843	1.0692	-9.14819	2.78e-14	1.58e-11	22.121
GPRIN1	2.4024	4.03931	9.13521	2.95e-14	1.62e-11	22.0623
CAB39L	-2.01675	2.74944	-9.05362	4.32e-14	2.27e-11	21.6935
TRMT9B	-3.56168	-0.686587	-9.02179	5.01e-14	2.54e-11	21.5497
MMP9	4.34396	6.25879	9.01175	5.25e-14	2.57e-11	21.5043
PLIN4	-4.66801	0.677905	-8.98664	5.9e-14	2.75e-11	21.3908
KIF14	2.74165	3.579	8.97777	6.15e-14	2.75e-11	21.3507
AIM2	4.08388	3.33429	8.97259	6.3e-14	2.75e-11	21.3273
KIF2C	2.32858	4.95943	8.96948	6.39e-14	2.75e-11	21.3132
AURKA	2.06358	4.63132	8.93471	7.51e-14	3.14e-11	21.156
EDN3	-5.32981	-2.58902	-8.88062	9.67e-14	3.92e-11	20.9115
EXO1	2.07777	3.38837	8.84686	1.13e-13	4.46e-11	20.7589
AQP7	-3.79166	-1.86873	-8.83869	1.17e-13	4.51e-11	20.722
MYOC	-4.25609	-3.18478	-8.83117	1.22e-13	4.55e-11	20.688
FSCN1	2.21825	9.16113	8.75498	1.73e-13	6.32e-11	20.3437
NCAPD2	1.2103	6.9031	8.74241	1.84e-13	6.53e-11	20.2868
NDRG2	-2.94386	5.79408	-8.73393	1.91e-13	6.63e-11	20.2485
SPAG5	1.92045	4.73376	8.69958	2.24e-13	7.6e-11	20.0933
SPOCD1	3.29217	1.6643	8.64608	2.88e-13	9.52e-11	19.8516
GPT	-3.791	0.0301241	-8.60425	3.5e-13	1.13e-10	19.6626
PLK1	2.50616	5.51667	8.59534	3.65e-13	1.14e-10	19.6224
DTL	2.00838	4.21278	8.5902	3.73e-13	1.14e-10	19.5992
CDCA5	2.14657	5.03429	8.58746	3.78e-13	1.14e-10	19.5868
KIF4A	2.38667	4.46851	8.57805	3.95e-13	1.17e-10	19.5443
CFTR	-5.21085	-1.76903	-8.57173	4.07e-13	1.18e-10	19.5157
ADAM12	3.76752	4.75164	8.54385	4.63e-13	1.32e-10	19.3899
LAMC2	3.69092	9.30882	8.53195	4.89e-13	1.36e-10	19.3361
COLGALT1	1.39276	7.15826	8.51662	5.26e-13	1.44e-10	19.2669
CLEC3B	-3.22434	0.868526	-8.49689	5.76e-13	1.54e-10	19.1778
MFAP2	2.94448	4.99275	8.46545	6.67e-13	1.75e-10	19.0359
INHBA	4.04233	5.9495	8.42065	8.21e-13	2.12e-10	18.8338
C1QTNF6	2.85135	4.64512	8.41408	8.47e-13	2.15e-10	18.8041
CD276	1.86575	6.82386	8.40351	8.89e-13	2.22e-10	18.7564
SH3BGRL2	-4.09981	3.06717	-8.36958	1.04e-12	2.52e-10	18.6034
BUB1	2.06941	4.60706	8.36674	1.05e-12	2.52e-10	18.5906
LOXL2	3.12765	5.47156	8.36526	1.06e-12	2.52e-10	18.5839
NDE1	1.4172	5.93752	8.34939	1.14e-12	2.66e-10	18.5124
GTSE1	2.1591	3.6864	8.30927	1.38e-12	3.16e-10	18.3315
MKI67	2.41825	7.10925	8.26051	1.73e-12	3.82e-10	18.1118
KLF15	-3.52312	-1.24716	-8.25667	1.76e-12	3.82e-10	18.0945
TLE2	-3.13369	2.07239	-8.25658	1.76e-12	3.82e-10	18.0941
WDHD1	1.66437	4.36628	8.25465	1.77e-12	3.82e-10	18.0854
CENPF	2.15018	5.98174	8.24055	1.89e-12	3.97e-10	18.0219
TTYH3	1.86885	6.91553	8.23842	1.91e-12	3.97e-10	18.0123
PRR11	2.09447	4.6543	8.23494	1.94e-12	3.97e-10	17.9966
DLGAP5	2.40799	4.62215	8.23381	1.95e-12	3.97e-10	17.9915
ARTN	3.36758	2.21124	8.22781	2.01e-12	4.02e-10	17.9645
NETO2	2.00709	4.83609	8.22412	2.04e-12	4.02e-10	17.9479
TK1	1.96731	6.3088	8.2217	2.07e-12	4.02e-10	17.937
CACNB4	-3.80543	-0.891912	-8.21766	2.11e-12	4.05e-10	17.9188
PLIN5	-3.5055	-0.685866	-8.20108	2.27e-12	4.31e-10	17.8441
CIP2A	1.83403	3.6594	8.14464	2.95e-12	5.53e-10	17.5901
CLDN10	-5.715	-1.32643	-8.13863	3.04e-12	5.61e-10	17.563
ACSM3	-2.67657	-0.0288534	-8.13359	3.11e-12	5.67e-10	17.5404
AGFG2	-1.75675	4.02321	-8.12654	3.21e-12	5.78e-10	17.5086
WDR66	2.32184	5.02514	8.11852	3.34e-12	5.91e-10	17.4726
SLC38A7	1.10739	4.87803	8.11655	3.37e-12	5.91e-10	17.4637
FMO2	-5.03198	1.87984	-8.07973	3.99e-12	6.92e-10	17.2981
FAM189A2	-3.89394	0.408614	-8.07537	4.07e-12	6.97e-10	17.2786
DLG2	-3.14286	-0.450571	-8.07227	4.13e-12	6.99e-10	17.2646
NCAPH	1.89994	4.2187	8.04135	4.77e-12	7.88e-10	17.1256
COL13A1	2.17498	1.81902	8.0411	4.77e-12	7.88e-10	17.1245
KIF18B	2.30502	3.907	8.03879	4.82e-12	7.88e-10	17.1141
TGFBI	3.30116	8.87139	8.03372	4.94e-12	7.97e-10	17.0914
ELF4	1.54786	5.91076	8.03136	4.99e-12	7.97e-10	17.0807
PRC1	1.70599	5.85245	8.01934	5.28e-12	8.34e-10	17.0268
ANLN	2.44983	6.17922	7.99883	5.8e-12	9.06e-10	16.9346
ECT2	1.67878	5.62532	7.98482	6.19e-12	9.57e-10	16.8717
PKMYT1	2.37972	4.65916	7.97059	6.61e-12	9.99e-10	16.8078
CA9	5.55175	3.21384	7.96979	6.64e-12	9.99e-10	16.8043
SORBS2	-3.45945	2.30677	-7.96849	6.68e-12	9.99e-10	16.7984
UBE2C	2.28015	5.1132	7.96372	6.83e-12	1.01e-09	16.777
NEK2	2.1861	3.64595	7.95639	7.06e-12	1.03e-09	16.7441
COL4A1	2.74199	8.26344	7.94677	7.38e-12	1.07e-09	16.7009
MMP14	1.60241	8.82193	7.94004	7.62e-12	1.08e-09	16.6707
MYRIP	-3.606	-1.43171	-7.93945	7.64e-12	1.08e-09	16.6681
CENPI	1.90935	2.45863	7.93761	7.7e-12	1.08e-09	16.6598
KIF23	2.07924	4.80053	7.92677	8.1e-12	1.13e-09	16.6112
COL12A1	3.26557	7.87721	7.91598	8.51e-12	1.17e-09	16.5628
RRAGD	-2.70651	3.49393	-7.91478	8.56e-12	1.17e-09	16.5574
FHIT	-2.52935	-0.0933211	-7.91201	8.67e-12	1.17e-09	16.545
SLC25A34	-2.86707	-0.437604	-7.89622	9.32e-12	1.25e-09	16.4742
CENPA	2.25687	2.89467	7.88943	9.62e-12	1.28e-09	16.4438
DEPDC1B	1.98588	3.11397	7.88438	9.85e-12	1.3e-09	16.4211
MMP13	5.57626	4.17391	7.87551	1.03e-11	1.34e-09	16.3814
HADH	-1.25579	5.30628	-7.87262	1.04e-11	1.34e-09	16.3684
E2F7	2.57429	3.31923	7.86698	1.07e-11	1.37e-09	16.3432
IL11	3.69804	1.52221	7.85509	1.13e-11	1.43e-09	16.2899
GNA12	1.3649	6.30476	7.83641	1.23e-11	1.54e-09	16.2062
TF	-5.76946	0.835469	-7.83462	1.24e-11	1.54e-09	16.1982
KIF20A	2.20131	4.92511	7.82153	1.32e-11	1.63e-09	16.1395
THRSP	-4.44129	-2.8659	-7.80725	1.41e-11	1.72e-09	16.0756
NFIX	-1.7493	6.1857	-7.798	1.47e-11	1.77e-09	16.0342
CRYM	-3.97217	-0.619329	-7.79637	1.48e-11	1.77e-09	16.0269
RAD54L	1.8438	2.82761	7.79543	1.48e-11	1.77e-09	16.0227
SERPINH1	2.04234	7.88632	7.79248	1.5e-11	1.77e-09	16.0095
FOXD2	1.76112	-0.119809	7.79167	1.51e-11	1.77e-09	16.0059
FANCI	1.67009	5.43654	7.77414	1.64e-11	1.91e-09	15.9274
HJURP	2.33286	3.68271	7.75713	1.77e-11	2.05e-09	15.8513
SHCBP1	2.08527	3.99195	7.75224	1.81e-11	2.06e-09	15.8295
C16orf89	-4.40229	-2.26452	-7.75215	1.81e-11	2.06e-09	15.8291
CAPN6	-4.82469	-0.652505	-7.74149	1.9e-11	2.15e-09	15.7814
UHRF1	2.10751	4.40163	7.73332	1.98e-11	2.21e-09	15.7449
IQGAP3	2.05799	4.30125	7.71904	2.11e-11	2.34e-09	15.6811
C16orf74	2.21762	3.92719	7.71544	2.15e-11	2.36e-09	15.665
CGNL1	-3.70185	2.26939	-7.70692	2.23e-11	2.44e-09	15.6269
CLSPN	2.23235	3.19072	7.68944	2.42e-11	2.61e-09	15.5488
ITGA5	2.58158	7.04494	7.68885	2.43e-11	2.61e-09	15.5462
NAV1	1.66674	6.746	7.65932	2.78e-11	2.96e-09	15.4143
CLU	-3.3237	6.23594	-7.65846	2.79e-11	2.96e-09	15.4105
PRH2	-4.59335	-3.06353	-7.65296	2.86e-11	3.01e-09	15.3859
CDC6	1.92493	4.59998	7.64733	2.94e-11	3.07e-09	15.3608
FAM3B	-5.64997	0.106533	-7.64463	2.97e-11	3.08e-09	15.3487
KPNA2	1.47873	7.34587	7.64361	2.99e-11	3.08e-09	15.3442
HP	-4.22496	-2.19714	-7.63699	3.08e-11	3.15e-09	15.3147
RPS6KA6	-3.88377	-1.74695	-7.6332	3.13e-11	3.15e-09	15.2977
MMP12	4.00207	4.76231	7.63236	3.14e-11	3.15e-09	15.294
CRBN	-1.11302	3.80493	-7.63219	3.15e-11	3.15e-09	15.2932
CCNB2	1.97693	4.83116	7.61793	3.36e-11	3.34e-09	15.2296
WNT7B	2.67284	5.83954	7.59453	3.74e-11	3.69e-09	15.1253
BCKDHB	-1.49018	2.91061	-7.58635	3.89e-11	3.81e-09	15.0888
MMP1	4.95124	7.21275	7.55808	4.42e-11	4.31e-09	14.9629
PEBP1	-1.09728	7.35098	-7.55115	4.57e-11	4.41e-09	14.932
ASPM	2.25817	4.8706	7.54885	4.61e-11	4.43e-09	14.9218
CDC25C	1.9571	1.95978	7.54264	4.75e-11	4.53e-09	14.8942
HOXD11	4.29204	1.20298	7.53713	4.87e-11	4.59e-09	14.8696
BUB1B	2.12028	4.22263	7.53576	4.9e-11	4.59e-09	14.8635
HOXA10	3.18758	0.58829	7.53411	4.94e-11	4.59e-09	14.8562
ULBP2	2.91643	3.36642	7.53402	4.94e-11	4.59e-09	14.8558
HOXA1	2.71763	1.74911	7.52754	5.09e-11	4.7e-09	14.827
BIRC5	2.11856	5.56752	7.52026	5.26e-11	4.82e-09	14.7946
CDCA3	1.89573	3.64735	7.51403	5.41e-11	4.93e-09	14.7668
MCM2	1.65382	6.3634	7.51057	5.5e-11	4.98e-09	14.7514
TFAP2B	-4.07792	-2.92387	-7.49644	5.87e-11	5.28e-09	14.6886
VSIG2	-3.85179	-0.708887	-7.4896	6.06e-11	5.41e-09	14.6582
PNPLA7	-2.4266	1.1995	-7.48142	6.29e-11	5.56e-09	14.6218
CKAP2L	2.12931	4.17847	7.48089	6.3e-11	5.56e-09	14.6195
GJC1	2.81238	2.87405	7.46206	6.87e-11	6.02e-09	14.5358
ERFE	2.98164	0.268882	7.46087	6.91e-11	6.02e-09	14.5305
TRIP13	2.10572	4.41044	7.45171	7.2e-11	6.24e-09	14.4898
HSD17B6	1.82635	0.837219	7.44303	7.5e-11	6.46e-09	14.4512
DPF1	2.93806	1.14955	7.43994	7.6e-11	6.5e-09	14.4375
PTGFRN	1.3438	8.27812	7.43901	7.63e-11	6.5e-09	14.4334
KIF18A	1.99843	3.18059	7.43501	7.78e-11	6.58e-09	14.4156
MTFR1L	-1.06705	4.43611	-7.43263	7.86e-11	6.61e-09	14.405
TOP2A	2.11501	6.80721	7.43131	7.91e-11	6.61e-09	14.3992
NOSTRIN	-1.96764	0.701849	-7.4234	8.2e-11	6.81e-09	14.3641
ZNF114	3.33424	1.25876	7.41632	8.47e-11	7e-09	14.3326
ADAMTS2	3.30065	5.44038	7.39037	9.54e-11	7.83e-09	14.2175
FAM3D	-5.49648	1.67999	-7.38202	9.91e-11	8.05e-09	14.1805
SPATA18	-2.17772	2.01511	-7.38049	9.98e-11	8.05e-09	14.1737
STATH	-7.43622	-1.53061	-7.38009	1e-10	8.05e-09	14.1719
ATAD2	1.65664	5.59443	7.37953	1e-10	8.05e-09	14.1695
IPO9	0.750711	6.41192	7.3753	1.02e-10	8.16e-09	14.1507
ZBTB16	-3.89967	-1.23176	-7.34823	1.16e-10	9.18e-09	14.0307
PEBP4	-3.71448	-2.40875	-7.34448	1.18e-10	9.29e-09	14.0141
CDC20	2.23376	6.08407	7.34302	1.18e-10	9.3e-09	14.0076
COL1A1	3.88749	11.1435	7.34113	1.19e-10	9.33e-09	13.9993
MELK	2.31219	4.50317	7.33488	1.23e-10	9.54e-09	13.9716
YEATS2	1.27489	5.81622	7.33338	1.24e-10	9.56e-09	13.965
BOC	-2.36836	3.41329	-7.3321	1.24e-10	9.56e-09	13.9593
TROAP	2.07995	3.7231	7.33057	1.25e-10	9.58e-09	13.9525
MCM10	1.9051	3.5011	7.32247	1.3e-10	9.88e-09	13.9166
DEPTOR	-3.18912	2.25808	-7.32047	1.31e-10	9.92e-09	13.9078
KLF7	1.68457	5.63764	7.29756	1.46e-10	1.1e-08	13.8064
SLC2A4	-3.59002	-0.43699	-7.28685	1.53e-10	1.14e-08	13.759
SLC4A4	-3.40559	-1.13467	-7.2852	1.54e-10	1.15e-08	13.7517
RAD51	1.69557	3.50488	7.28282	1.56e-10	1.15e-08	13.7412
C7	-5.13519	-0.807309	-7.27487	1.62e-10	1.19e-08	13.706
COL5A2	3.34061	7.50408	7.27301	1.63e-10	1.19e-08	13.6979
TRPV6	-3.79821	-1.04425	-7.26386	1.7e-10	1.24e-08	13.6574
PLP1	-3.91597	-1.43811	-7.25876	1.74e-10	1.26e-08	13.6349
PDHB	-1.01322	5.24652	-7.25772	1.75e-10	1.26e-08	13.6303
CIPC	-1.09798	4.50674	-7.25121	1.8e-10	1.29e-08	13.6015
KIF26B	2.46836	3.95123	7.24522	1.85e-10	1.32e-08	13.575
NCAPG	1.9675	4.37169	7.24042	1.89e-10	1.34e-08	13.5538
ACOX2	-2.67113	0.321613	-7.24013	1.89e-10	1.34e-08	13.5526
LIMK1	1.05187	6.12708	7.2344	1.94e-10	1.36e-08	13.5272
COL5A1	3.25879	8.02458	7.23433	1.94e-10	1.36e-08	13.5269
ACADVL	-1.19153	7.35553	-7.23255	1.96e-10	1.36e-08	13.5191
NR3C2	-3.544	-0.145315	-7.22815	2e-10	1.38e-08	13.4996
IGF2BP2	2.80383	5.66814	7.22782	2e-10	1.38e-08	13.4982
CHST9	-5.16232	-1.83669	-7.21569	2.12e-10	1.45e-08	13.4447
EME1	1.7351	1.59584	7.2135	2.14e-10	1.46e-08	13.435
HMGA2	4.90936	3.30814	7.20963	2.17e-10	1.48e-08	13.4179
CDCA8	2.02734	4.52386	7.20371	2.23e-10	1.51e-08	13.3918
ISOC1	-1.1534	3.92801	-7.20018	2.27e-10	1.53e-08	13.3762
STON2	1.68288	5.90634	7.19294	2.35e-10	1.57e-08	13.3443
SLC36A1	1.19911	4.58581	7.19226	2.35e-10	1.57e-08	13.3413
FZD2	1.81934	2.11849	7.1913	2.36e-10	1.57e-08	13.337
SH2D2A	2.14435	2.87697	7.18745	2.41e-10	1.59e-08	13.3201
ITM2A	-2.83545	2.70968	-7.18116	2.48e-10	1.63e-08	13.2923
CENPO	1.1467	3.63529	7.17156	2.59e-10	1.69e-08	13.25
PLA2G2A	-5.48158	0.76411	-7.16349	2.68e-10	1.75e-08	13.2145
SLC16A3	1.72239	6.31885	7.15069	2.84e-10	1.84e-08	13.1581
SLC2A1	2.48238	9.74711	7.14765	2.88e-10	1.86e-08	13.1447
GREM2	-3.68897	-1.13531	-7.14582	2.91e-10	1.87e-08	13.1366
HASPIN	1.61207	2.09611	7.1367	3.03e-10	1.94e-08	13.0965
KNL1	2.01342	4.11749	7.1324	3.09e-10	1.97e-08	13.0775
TSPAN8	-4.38394	-1.73275	-7.1228	3.23e-10	2.04e-08	13.0353
SCGB2A2	-3.31128	-3.61026	-7.12222	3.23e-10	2.04e-08	13.0327
PDK4	-3.76179	1.95971	-7.12193	3.24e-10	2.04e-08	13.0315
EXT1	1.29093	6.88028	7.11806	3.3e-10	2.06e-08	13.0145
CCN4	3.21027	2.88213	7.11014	3.42e-10	2.13e-08	12.9796
CYP4B1	-5.24083	0.683406	-7.10689	3.47e-10	2.15e-08	12.9653
ARHGAP11A	1.73306	4.69877	7.10459	3.5e-10	2.17e-08	12.9552
CENPE	2.11287	4.1576	7.10234	3.54e-10	2.18e-08	12.9453
ISG15	3.31782	6.65596	7.09961	3.58e-10	2.2e-08	12.9333
FABP7	-4.06724	-2.65512	-7.0938	3.68e-10	2.24e-08	12.9078
SUCLG2	-1.06574	5.11623	-7.09236	3.7e-10	2.25e-08	12.9014
HAPLN1	3.00918	0.608964	7.08445	3.84e-10	2.32e-08	12.8667
ENPP3	-3.62241	-2.21947	-7.08397	3.85e-10	2.32e-08	12.8646
APPL1	-0.994869	5.3672	-7.07465	4.01e-10	2.41e-08	12.8236
FGD6	1.37337	5.14102	7.07273	4.05e-10	2.41e-08	12.8152
LTF	-7.31637	1.8389	-7.07232	4.06e-10	2.41e-08	12.8134
PLAC1	3.50983	-0.149558	7.0595	4.3e-10	2.54e-08	12.7571
CHAD	-3.47602	-1.75621	-7.05893	4.31e-10	2.54e-08	12.7546
CDKN3	1.64381	3.71916	7.05311	4.42e-10	2.6e-08	12.729
RORC	-3.70868	1.14176	-7.05154	4.46e-10	2.61e-08	12.7221
CHPT1	-2.23935	3.27989	-7.04311	4.63e-10	2.7e-08	12.6851
STC2	3.14496	3.64725	7.03535	4.8e-10	2.78e-08	12.6511
SELENBP1	-3.15465	2.63744	-7.02514	5.02e-10	2.9e-08	12.6063
SMDT1	-1.24559	4.38219	-7.01919	5.16e-10	2.97e-08	12.5802
KIF11	1.68504	5.36367	7.01845	5.18e-10	2.97e-08	12.5769
BNC1	2.87377	6.60196	7.01233	5.32e-10	3.04e-08	12.5501
AGRN	1.55957	8.6591	7.00789	5.43e-10	3.09e-08	12.5307
CCNA2	2.04923	5.01218	7.00397	5.53e-10	3.13e-08	12.5135
PTK7	1.50089	7.3722	6.99958	5.64e-10	3.18e-08	12.4942
TCEAL2	-3.53295	-2.00961	-6.99313	5.8e-10	3.26e-08	12.466
XPR1	1.10663	6.21187	6.98693	5.97e-10	3.34e-08	12.4388
IFI27	2.81197	8.84923	6.96721	6.53e-10	3.64e-08	12.3525
LRRC26	-3.59788	-3.15996	-6.96481	6.6e-10	3.66e-08	12.342
USB1	1.24593	6.34879	6.96338	6.64e-10	3.67e-08	12.3357
SERPINE1	2.92279	7.49972	6.95362	6.94e-10	3.82e-08	12.293
TMEM184B	1.09152	6.60802	6.94781	7.12e-10	3.91e-08	12.2676
NDC80	1.97808	3.88611	6.9425	7.29e-10	3.99e-08	12.2444
MGAM2	-3.57664	-3.17578	-6.93979	7.38e-10	4.02e-08	12.2325
ETFDH	-1.34013	4.07951	-6.93912	7.41e-10	4.02e-08	12.2296
AQP5	-5.77878	-0.208251	-6.93369	7.59e-10	4.1e-08	12.2059
ALG1L	2.4128	2.53115	6.92946	7.74e-10	4.16e-08	12.1874
ERCC6L	1.88193	2.62117	6.92521	7.89e-10	4.22e-08	12.1688
HOXC13	3.71917	2.51185	6.92483	7.9e-10	4.22e-08	12.1672
DNMT3B	2.21272	3.01979	6.92057	8.05e-10	4.27e-08	12.1485
CDC45	1.96779	3.84531	6.92015	8.07e-10	4.27e-08	12.1467
GNG7	-2.53933	0.797625	-6.91994	8.08e-10	4.27e-08	12.1458
CDCA2	2.04844	3.4952	6.91743	8.17e-10	4.3e-08	12.1348
MYO10	1.5391	6.90493	6.91244	8.35e-10	4.38e-08	12.113
GMDS	-1.51242	4.26125	-6.91019	8.44e-10	4.41e-08	12.1032
GALNT16	-3.56592	-0.415794	-6.90614	8.59e-10	4.47e-08	12.0855
ZG16B	-6.58596	1.23783	-6.89627	8.98e-10	4.66e-08	12.0425
HOXC9	2.83155	-0.39336	6.89084	9.21e-10	4.75e-08	12.0187
PRIM2	1.20587	3.79155	6.89041	9.23e-10	4.75e-08	12.0168
TTK	1.88314	4.00135	6.88949	9.26e-10	4.75e-08	12.0129
SORBS1	-2.76219	2.78663	-6.8874	9.35e-10	4.78e-08	12.0037
CDT1	1.69962	4.53056	6.87956	9.69e-10	4.93e-08	11.9695
NUCB2	-1.59466	5.34986	-6.878	9.76e-10	4.95e-08	11.9627
ACAD8	-1.33754	3.53473	-6.87159	1e-09	5.08e-08	11.9348
CHRM1	-3.92278	-2.8008	-6.86133	1.05e-09	5.3e-08	11.89
SKA1	1.96011	3.06948	6.8575	1.07e-09	5.37e-08	11.8733
SLC16A1	1.88257	7.29942	6.85343	1.09e-09	5.45e-08	11.8556
MRGBP	1.17678	4.64198	6.85064	1.1e-09	5.5e-08	11.8434
PCCA	-1.34397	3.40571	-6.84586	1.13e-09	5.6e-08	11.8226
TIMELESS	1.18218	5.54433	6.84482	1.13e-09	5.61e-08	11.8181
ORC1	1.89347	3.43515	6.83844	1.17e-09	5.75e-08	11.7903
PEG3	-3.58828	-0.319499	-6.83783	1.17e-09	5.75e-08	11.7876
SNAI2	1.43618	5.96171	6.83362	1.19e-09	5.84e-08	11.7693
PPP1R1B	-5.55078	-0.806184	-6.83274	1.2e-09	5.84e-08	11.7655
MTFR2	1.76455	2.09856	6.83079	1.21e-09	5.87e-08	11.757
UBXN7	1.04236	5.97279	6.83003	1.21e-09	5.87e-08	11.7537
COL4A2	2.35713	8.46811	6.81856	1.27e-09	6.16e-08	11.7037
TEDC2	1.73434	2.39382	6.81655	1.29e-09	6.2e-08	11.695
NRM	0.984599	4.49555	6.80373	1.36e-09	6.54e-08	11.6392
KCTD6	-1.24861	1.76147	-6.80241	1.37e-09	6.56e-08	11.6335
MTMR10	-0.953905	4.38871	-6.80085	1.38e-09	6.58e-08	11.6267
CDH19	-3.71537	-1.84073	-6.79969	1.39e-09	6.59e-08	11.6217
ATP5F1A	-0.992824	8.56116	-6.7986	1.39e-09	6.6e-08	11.6169
AURKB	2.09033	4.30564	6.79686	1.4e-09	6.63e-08	11.6094
CDCA4	1.46017	5.5191	6.7951	1.42e-09	6.66e-08	11.6017
PPP1R9A	-3.81461	-1.58616	-6.76649	1.61e-09	7.55e-08	11.4774
ERBB4	-3.62682	-2.44951	-6.76588	1.61e-09	7.55e-08	11.4747
KIAA1143	-0.739352	4.08168	-6.75862	1.67e-09	7.77e-08	11.4432
CDK1	1.76232	5.23125	6.75406	1.7e-09	7.91e-08	11.4234
CIT	1.48776	4.69456	6.74534	1.77e-09	8.19e-08	11.3856
SLC38A3	-3.48923	-1.03355	-6.7421	1.8e-09	8.27e-08	11.3715
LPIN1	-1.72216	4.12158	-6.7418	1.8e-09	8.27e-08	11.3702
COL7A1	2.20756	7.79371	6.73719	1.84e-09	8.42e-08	11.3502
ZNF844	-2.64616	1.3269	-6.73126	1.89e-09	8.6e-08	11.3245
PIP	-6.03876	-2.4739	-6.73097	1.89e-09	8.6e-08	11.3233
ABCA8	-3.80515	0.410773	-6.7251	1.94e-09	8.8e-08	11.2978
ZIC2	3.73172	1.37672	6.72407	1.95e-09	8.81e-08	11.2934
AOX1	-2.70864	1.62739	-6.7224	1.96e-09	8.85e-08	11.2861
RPL15	-1.01718	8.77933	-6.71833	2e-09	8.98e-08	11.2685
GADD45B	-1.78886	4.83621	-6.71469	2.03e-09	9.1e-08	11.2527
LAMA3	2.52694	8.03316	6.71055	2.07e-09	9.24e-08	11.2347
PLXNA1	1.21007	7.32747	6.70673	2.1e-09	9.37e-08	11.2182
ANGPTL1	-3.58045	-0.366886	-6.69729	2.19e-09	9.75e-08	11.1773
TMEM220	-2.07433	0.801146	-6.67499	2.42e-09	1.07e-07	11.0809
TM4SF19	2.79462	1.91111	6.67297	2.45e-09	1.08e-07	11.0721
ASF1B	1.77375	4.53092	6.67269	2.45e-09	1.08e-07	11.0709
PLAC9	-2.47342	0.525207	-6.67133	2.46e-09	1.08e-07	11.065
KNTC1	1.2831	4.29692	6.67126	2.47e-09	1.08e-07	11.0647
BMP3	-3.86838	-2.54265	-6.66712	2.51e-09	1.09e-07	11.0468
RACGAP1	1.45444	5.61903	6.66476	2.54e-09	1.1e-07	11.0366
BEX4	-2.46091	2.67563	-6.66092	2.58e-09	1.12e-07	11.02
SPATA6	-2.19662	0.672699	-6.65933	2.6e-09	1.12e-07	11.0131
ESRRG	-3.63229	-1.8192	-6.64483	2.77e-09	1.19e-07	10.9505
TESC	-2.48782	0.0284027	-6.63986	2.84e-09	1.22e-07	10.929
MMP11	4.09478	4.6191	6.63921	2.84e-09	1.22e-07	10.9262
TPCN1	-0.96382	5.05475	-6.63096	2.95e-09	1.26e-07	10.8906
CCNF	1.52392	4.76414	6.61869	3.12e-09	1.33e-07	10.8376
CDH24	1.49196	3.26756	6.60479	3.32e-09	1.41e-07	10.7777
UBE2S	1.5497	4.76575	6.60129	3.37e-09	1.42e-07	10.7626
METTL7A	-2.9421	4.15194	-6.595	3.46e-09	1.46e-07	10.7355
FAM72B	1.85852	0.14479	6.57862	3.73e-09	1.57e-07	10.6649
AUNIP	1.55733	2.1552	6.57409	3.8e-09	1.59e-07	10.6454
BST2	2.74482	6.99663	6.57372	3.81e-09	1.59e-07	10.6438
RAB31	1.54334	7.24017	6.57307	3.82e-09	1.59e-07	10.641
PCSK9	3.41262	4.3917	6.56958	3.88e-09	1.61e-07	10.626
RNF125	-1.54645	1.58465	-6.56523	3.95e-09	1.64e-07	10.6073
TACC3	1.58917	5.73448	6.56208	4.01e-09	1.66e-07	10.5937
POLQ	2.08363	3.11472	6.55932	4.06e-09	1.67e-07	10.5818
MYO1B	1.88913	7.79011	6.55809	4.08e-09	1.68e-07	10.5766
IGF2BP3	4.1638	2.59196	6.55757	4.09e-09	1.68e-07	10.5743
TPBG	1.38207	6.12098	6.55619	4.12e-09	1.68e-07	10.5684
STIL	1.52857	3.8855	6.55494	4.14e-09	1.68e-07	10.563
FANCA	1.56993	3.48244	6.55481	4.14e-09	1.68e-07	10.5624
ID4	-2.39877	2.8118	-6.55179	4.2e-09	1.7e-07	10.5494
ADAMTS12	3.39162	3.60297	6.5505	4.22e-09	1.7e-07	10.5439
SMR3B	-6.47754	-2.83491	-6.54641	4.3e-09	1.73e-07	10.5263
TTYH1	-2.5111	-0.49301	-6.54302	4.36e-09	1.75e-07	10.5117
NTRK3	-3.51716	-1.04699	-6.54091	4.41e-09	1.76e-07	10.5026
SMARCD3	-2.2131	2.29101	-6.53487	4.53e-09	1.81e-07	10.4767
ITGB4	1.59719	9.65371	6.53269	4.57e-09	1.82e-07	10.4674
IRAK1BP1	-1.69399	1.01913	-6.53191	4.58e-09	1.82e-07	10.464
SMG7	0.678603	6.72364	6.52158	4.8e-09	1.9e-07	10.4196
MSRA	-1.37606	2.43182	-6.5208	4.82e-09	1.9e-07	10.4163
PLAU	2.31902	7.51771	6.5196	4.84e-09	1.9e-07	10.4111
P4HA2	1.39089	6.40995	6.51953	4.84e-09	1.9e-07	10.4108
TREM1	2.69128	2.54398	6.51713	4.9e-09	1.92e-07	10.4005
SLC25A20	-1.26662	2.908	-6.51025	5.05e-09	1.97e-07	10.371
ACADSB	-1.66781	3.44814	-6.49931	5.3e-09	2.06e-07	10.324
TENM2	3.02484	6.93342	6.49676	5.36e-09	2.08e-07	10.3131
LAMB3	2.22738	9.27999	6.49041	5.51e-09	2.13e-07	10.2858
HMMR	1.88011	3.87862	6.48909	5.54e-09	2.13e-07	10.2802
CRTAC1	-3.38319	0.00320004	-6.48879	5.55e-09	2.13e-07	10.2789
CGAS	1.60241	4.15602	6.48862	5.56e-09	2.13e-07	10.2782
MAPT	-3.29713	0.861639	-6.48724	5.59e-09	2.14e-07	10.2723
FNDC5	-3.35149	-0.704223	-6.47406	5.93e-09	2.26e-07	10.2157
JAG1	1.51485	8.23901	6.47222	5.97e-09	2.28e-07	10.2079
CLDN11	-2.66924	0.0776201	-6.46668	6.12e-09	2.33e-07	10.1841
MYZAP	-2.85029	0.501416	-6.45871	6.34e-09	2.4e-07	10.15
CHST15	1.22961	5.41956	6.45796	6.36e-09	2.41e-07	10.1468
HOXD9	1.82084	1.67582	6.45417	6.47e-09	2.43e-07	10.1306
ADAR	0.936495	8.49666	6.454	6.48e-09	2.43e-07	10.1299
GSDME	2.19861	4.84484	6.45287	6.51e-09	2.44e-07	10.125
TICRR	1.94491	3.60513	6.45063	6.57e-09	2.46e-07	10.1155
GINS1	1.52237	4.21974	6.44521	6.73e-09	2.51e-07	10.0922
COL10A1	4.81699	2.96086	6.4424	6.82e-09	2.54e-07	10.0802
RAD51AP1	1.41271	3.0331	6.43499	7.04e-09	2.61e-07	10.0485
PDE8B	-1.4534	1.65296	-6.43412	7.07e-09	2.62e-07	10.0448
CIRBP	-1.10781	6.53209	-6.42887	7.24e-09	2.67e-07	10.0224
TFF3	-4.48625	0.0314754	-6.42365	7.41e-09	2.73e-07	10.0001
PRB4	-2.73127	-3.7713	-6.41956	7.54e-09	2.77e-07	9.98258
CLYBL	-1.97179	1.66523	-6.41731	7.62e-09	2.79e-07	9.97295
HLF	-3.66584	1.89156	-6.40886	7.91e-09	2.89e-07	9.93686
CHEK1	1.33304	4.21575	6.40425	8.07e-09	2.94e-07	9.9172
DCBLD1	1.78635	4.95813	6.40147	8.17e-09	2.97e-07	9.90532
ATP6V0A4	-4.31141	0.531301	-6.39633	8.35e-09	3.03e-07	9.8834
ALDH9A1	-1.35682	6.43323	-6.39601	8.37e-09	3.03e-07	9.882
CHST11	1.92507	5.29718	6.38562	8.76e-09	3.16e-07	9.83769
POU2F1	0.622447	4.63964	6.38377	8.83e-09	3.18e-07	9.82981
SELENOK	-0.907101	4.57707	-6.38171	8.91e-09	3.2e-07	9.82103
UBL3	-1.28566	5.11197	-6.38111	8.94e-09	3.2e-07	9.81843
ADAM8	1.96117	4.71996	6.37476	9.19e-09	3.28e-07	9.79139
DEPDC1	1.92816	3.71506	6.37337	9.25e-09	3.29e-07	9.78544
DOCK3	-1.97662	0.139348	-6.36525	9.58e-09	3.4e-07	9.75084
TONSL	1.48697	4.40794	6.36421	9.63e-09	3.41e-07	9.74642
CCNE1	1.45912	3.03616	6.36143	9.74e-09	3.44e-07	9.73459
RMI2	1.61141	3.78659	6.36137	9.75e-09	3.44e-07	9.73432
ARHGEF10L	-1.57317	5.05535	-6.35642	9.96e-09	3.5e-07	9.71322
ETFRF1	-1.11982	3.05502	-6.35544	1e-08	3.51e-07	9.70905
EFNB1	1.5334	7.45417	6.34684	1.04e-08	3.64e-07	9.67244
MINDY1	-1.33218	3.96944	-6.34516	1.05e-08	3.66e-07	9.6653
CPEB3	-1.5819	2.52064	-6.34351	1.05e-08	3.67e-07	9.65829
TMEM213	-4.42719	-2.82061	-6.34107	1.07e-08	3.7e-07	9.64788
QARS1	-0.883297	7.15266	-6.34053	1.07e-08	3.7e-07	9.6456
SHOX2	2.40898	1.46936	6.33896	1.08e-08	3.72e-07	9.63891
CXCL13	3.59608	3.14097	6.33724	1.08e-08	3.74e-07	9.63158
NUSAP1	1.66851	5.37681	6.33493	1.1e-08	3.77e-07	9.62176
KIFC1	1.80421	4.97058	6.32924	1.12e-08	3.85e-07	9.59755
EHD2	1.20678	7.77537	6.32532	1.14e-08	3.9e-07	9.58088
CENPN	1.17093	3.97427	6.32517	1.14e-08	3.9e-07	9.58025
BPIFA2	-3.04556	-3.70679	-6.32321	1.15e-08	3.93e-07	9.57194
CFD	-2.27261	3.4346	-6.32161	1.16e-08	3.95e-07	9.56512
ORC6	1.66877	2.95526	6.31839	1.18e-08	3.99e-07	9.55145
GPX3	-2.84833	5.59713	-6.31552	1.19e-08	4.04e-07	9.53926
TRAM2	1.52159	5.39113	6.31489	1.2e-08	4.04e-07	9.53658
TMEM132A	1.55749	6.36497	6.3014	1.27e-08	4.27e-07	9.47929
GALNT2	1.04902	7.17922	6.29537	1.3e-08	4.38e-07	9.45367
CLDN8	-4.68725	-1.27678	-6.28957	1.34e-08	4.47e-07	9.42904
FAM149A	-2.58695	-0.00647111	-6.28944	1.34e-08	4.47e-07	9.42849
CCNB1	1.6893	6.00932	6.28744	1.35e-08	4.5e-07	9.42003
HOXD10	3.59888	2.02103	6.28327	1.37e-08	4.57e-07	9.40235
FANCB	1.42021	0.810323	6.28101	1.39e-08	4.61e-07	9.39276
ITGA6	1.93558	9.52708	6.2802	1.39e-08	4.61e-07	9.38931
FAM72A	1.44737	-0.166086	6.2783	1.4e-08	4.64e-07	9.38123
LRRC2	-3.66106	-1.3128	-6.27506	1.42e-08	4.7e-07	9.36752
LASP1	0.934541	7.85808	6.27419	1.43e-08	4.7e-07	9.36384
PRRT3	-1.34977	0.904323	-6.27146	1.45e-08	4.75e-07	9.35226
ATP6V1C1	0.731665	5.79512	6.26284	1.5e-08	4.92e-07	9.31573
HINT3	-0.955545	4.63721	-6.26042	1.52e-08	4.96e-07	9.30547
ABHD5	-1.3597	4.24282	-6.25945	1.53e-08	4.97e-07	9.30135
ZFP64	0.852247	4.62981	6.25506	1.55e-08	5.06e-07	9.28278
MORC2	0.853948	5.68675	6.25223	1.57e-08	5.11e-07	9.2708
ICA1	-2.49507	1.33457	-6.2505	1.59e-08	5.14e-07	9.26346
MTBP	1.36601	2.62208	6.24763	1.61e-08	5.19e-07	9.2513
ATP2B2	-3.11608	-1.91549	-6.24023	1.66e-08	5.35e-07	9.21998
PI16	-4.54386	-0.514561	-6.22892	1.74e-08	5.61e-07	9.17214
ZNF677	-2.21891	0.419112	-6.21843	1.83e-08	5.86e-07	9.1278
TIMP4	-3.05485	-1.19488	-6.21512	1.85e-08	5.93e-07	9.11384
SVIP	-2.68757	1.60201	-6.21152	1.88e-08	6.01e-07	9.09861
GNGT1	3.13688	-0.0896698	6.20908	1.9e-08	6.06e-07	9.0883
COL5A3	2.16176	5.77716	6.20611	1.93e-08	6.12e-07	9.07576
PAK2	0.881442	7.19914	6.20241	1.96e-08	6.21e-07	9.06013
MCM4	1.1594	7.15736	6.19954	1.98e-08	6.27e-07	9.04803
HELZ2	1.66668	6.64563	6.19789	2e-08	6.31e-07	9.04105
CHRDL1	-4.44504	-0.0556344	-6.19304	2.04e-08	6.43e-07	9.0206
FOXD1	2.68708	1.86401	6.19126	2.06e-08	6.46e-07	9.01308
ADH1C	-4.50829	-1.71751	-6.19004	2.07e-08	6.48e-07	9.0079
TNFAIP8L1	1.15709	4.4358	6.18882	2.08e-08	6.5e-07	9.00277
TUBB3	2.2079	2.08494	6.18824	2.08e-08	6.5e-07	9.00035
E2F1	1.39901	3.5808	6.18611	2.1e-08	6.55e-07	8.99133
VAV2	1.58303	5.84861	6.17513	2.21e-08	6.86e-07	8.94505
ZWINT	1.42808	4.9652	6.17461	2.21e-08	6.86e-07	8.94285
HOXC11	3.38026	0.198039	6.17145	2.24e-08	6.94e-07	8.92955
ZNF626	-2.47373	-0.0433471	-6.16908	2.26e-08	6.99e-07	8.91956
SKA3	1.74488	3.32037	6.16876	2.27e-08	6.99e-07	8.9182
BRCA1	1.20784	4.22601	6.16671	2.29e-08	7.04e-07	8.90954
TLE5	-0.866558	7.73501	-6.1619	2.34e-08	7.17e-07	8.88929
HOXC8	2.65152	-0.826162	6.16128	2.34e-08	7.18e-07	8.88668
RAC2	1.68656	5.70903	6.15755	2.38e-08	7.28e-07	8.87097
ACKR1	-3.64973	1.95601	-6.15694	2.39e-08	7.28e-07	8.86839
APOD	-3.46001	3.1649	-6.15109	2.45e-08	7.45e-07	8.8438
GTF2IRD2B	-1.63886	0.279082	-6.15014	2.46e-08	7.47e-07	8.83978
SNX10	1.75201	3.51939	6.14897	2.47e-08	7.49e-07	8.83484
NISCH	-0.823403	5.46911	-6.14809	2.48e-08	7.5e-07	8.83115
FERMT1	2.06037	6.96013	6.14742	2.49e-08	7.51e-07	8.82832
CTHRC1	3.02289	4.35557	6.14591	2.5e-08	7.54e-07	8.82199
ATP8B3	1.70084	1.22604	6.14242	2.54e-08	7.63e-07	8.8073
MAGIX	-1.41875	0.82325	-6.1422	2.55e-08	7.63e-07	8.80635
MICAL2	1.77612	5.80584	6.13623	2.61e-08	7.82e-07	8.78127
COL27A1	1.60379	5.14426	6.1347	2.63e-08	7.85e-07	8.77482
XRCC2	1.63354	2.067	6.13401	2.64e-08	7.86e-07	8.77193
NEMP1	1.20942	4.42898	6.13324	2.65e-08	7.87e-07	8.76866
PPARG	-3.08163	0.810164	-6.13259	2.65e-08	7.88e-07	8.76593
PLK4	1.44498	3.55329	6.12977	2.69e-08	7.96e-07	8.75409
DIAPH3	1.55324	3.62701	6.12931	2.69e-08	7.96e-07	8.75215
EIF2AK2	1.22573	6.5399	6.12739	2.72e-08	8.01e-07	8.74409
SLC16A11	-2.32893	-0.917308	-6.12546	2.74e-08	8.06e-07	8.73598
BORA	1.24288	2.71892	6.12126	2.79e-08	8.19e-07	8.71831
MAGI1	-1.43181	3.69196	-6.1205	2.8e-08	8.2e-07	8.71514
NUF2	1.69519	3.16182	6.11552	2.86e-08	8.36e-07	8.69423
ACADM	-1.20471	4.87973	-6.11402	2.88e-08	8.4e-07	8.6879
ITPR3	1.43146	7.39154	6.10892	2.94e-08	8.57e-07	8.6665
CHADL	-1.85902	0.631386	-6.10088	3.05e-08	8.86e-07	8.63273
SESN1	-1.21628	3.814	-6.09926	3.07e-08	8.9e-07	8.62594
LMNB2	1.30083	7.26855	6.09676	3.1e-08	8.98e-07	8.61546
PRADC1	-1.24459	3.55086	-6.09536	3.12e-08	9.01e-07	8.60958
ZNF132	-1.23572	0.71246	-6.09228	3.16e-08	9.12e-07	8.59667
CNGB1	4.05412	2.87335	6.09124	3.18e-08	9.14e-07	8.5923
RRM2	1.92725	6.18098	6.09011	3.19e-08	9.17e-07	8.58755
ZIC5	3.81874	0.377623	6.08955	3.2e-08	9.17e-07	8.58521
RNF150	-2.88545	1.41989	-6.0861	3.25e-08	9.29e-07	8.57076
TACR1	-3.08517	-1.16109	-6.08338	3.29e-08	9.38e-07	8.55935
SPC25	1.55861	2.56318	6.08094	3.32e-08	9.45e-07	8.54913
PGM5	-2.7883	0.515755	-6.08026	3.33e-08	9.45e-07	8.54627
GPT2	-1.72966	5.61589	-6.08025	3.33e-08	9.45e-07	8.54622
C1orf112	1.0226	2.87049	6.07547	3.4e-08	9.63e-07	8.5262
PRR4	-4.12874	-0.889727	-6.07191	3.46e-08	9.75e-07	8.51129
SLC25A16	-0.739586	3.51801	-6.07185	3.46e-08	9.75e-07	8.51102
LPCAT1	1.52978	5.91357	6.06783	3.52e-08	9.9e-07	8.49418
FOXF2	2.05808	2.26642	6.06549	3.55e-08	9.98e-07	8.48439
ABCD3	-0.951143	5.22309	-6.06206	3.61e-08	1.01e-06	8.47003
S1PR5	1.80942	3.72268	6.06078	3.63e-08	1.01e-06	8.46469
GATM	-2.72706	3.11513	-6.06019	3.64e-08	1.02e-06	8.4622
BICD1	1.60375	3.59657	6.05698	3.69e-08	1.03e-06	8.44876
UBE2D4	-0.976782	3.18246	-6.05526	3.71e-08	1.03e-06	8.44158
HEMK1	-1.00545	3.1651	-6.05221	3.76e-08	1.04e-06	8.42883
COL3A1	3.31039	10.4543	6.04787	3.83e-08	1.06e-06	8.41067
BLOC1S3	0.983383	4.18459	6.0475	3.84e-08	1.06e-06	8.40911
PPARGC1A	-3.43024	0.663745	-6.04467	3.89e-08	1.07e-06	8.39728
RNF180	-2.39229	-0.063624	-6.04443	3.89e-08	1.07e-06	8.39627
PRB3	-3.33412	-2.17374	-6.03786	4e-08	1.1e-06	8.36879
GPR176	2.41806	4.07314	6.03516	4.05e-08	1.11e-06	8.3575
FOXO4	-1.14662	3.59838	-6.02883	4.16e-08	1.14e-06	8.33108
P3H1	1.53285	5.01623	6.02237	4.28e-08	1.17e-06	8.30408
KCNJ16	-3.11958	-3.0202	-6.0218	4.29e-08	1.17e-06	8.30169
FMNL3	1.19584	4.88293	6.02026	4.32e-08	1.17e-06	8.29526
WNT2	3.55353	0.960771	6.0202	4.32e-08	1.17e-06	8.29504
HOXD13	4.06077	0.387887	6.01444	4.43e-08	1.2e-06	8.27098
GRIN2D	3.02601	2.36985	6.01106	4.5e-08	1.22e-06	8.25686
KIF3C	1.57514	4.01682	6.01048	4.51e-08	1.22e-06	8.25446
PRKAR2A	-0.822708	5.83552	-6.00991	4.52e-08	1.22e-06	8.25207
KCNB1	-3.09448	-1.93192	-6.00733	4.57e-08	1.23e-06	8.2413
NICN1	-1.16372	2.50108	-6.00642	4.59e-08	1.23e-06	8.23751
PLEC	1.21611	10.1863	5.99316	4.86e-08	1.3e-06	8.18225
PSMD2	0.934172	8.60562	5.99284	4.87e-08	1.3e-06	8.18088
FKBP9	1.05845	7.00276	5.99143	4.89e-08	1.31e-06	8.17502
SLC25A23	-1.71477	5.21212	-5.99143	4.89e-08	1.31e-06	8.17501
TGFBR3	-2.50724	3.26914	-5.99081	4.91e-08	1.31e-06	8.17242
SLC7A5	1.89363	9.1067	5.98345	5.07e-08	1.35e-06	8.14177
MT-ND6	-1.71178	8.58213	-5.96948	5.38e-08	1.43e-06	8.08361
PRR15L	-3.24359	0.0668723	-5.96806	5.41e-08	1.43e-06	8.0777
C18orf54	1.35982	2.35158	5.96535	5.48e-08	1.45e-06	8.06643
CMIP	0.949223	7.28478	5.96213	5.55e-08	1.46e-06	8.05302
PARP14	1.6001	6.81193	5.96076	5.59e-08	1.47e-06	8.04733
ALDH2	-1.50196	6.49762	-5.95936	5.62e-08	1.48e-06	8.04153
PLAUR	1.76724	5.60702	5.95762	5.66e-08	1.48e-06	8.03429
LAMA5	1.01956	7.51433	5.95636	5.69e-08	1.49e-06	8.02904
ARL1	-0.721934	5.7673	-5.95495	5.73e-08	1.5e-06	8.02315
GLYATL2	-3.73991	-1.91458	-5.95469	5.74e-08	1.5e-06	8.02209
CTSV	2.13538	5.76432	5.95417	5.75e-08	1.5e-06	8.01994
PDPN	1.88798	6.4972	5.95254	5.79e-08	1.5e-06	8.01314
ECHDC2	-1.72839	3.6569	-5.95081	5.83e-08	1.51e-06	8.00597
FAP	2.87146	3.53078	5.94649	5.94e-08	1.54e-06	7.98802
LPO	-4.20028	-2.347	-5.94537	5.97e-08	1.54e-06	7.98336
GNA14	-2.18728	-0.381276	-5.945	5.98e-08	1.54e-06	7.98184
IL17RC	-1.11384	4.60064	-5.94135	6.07e-08	1.56e-06	7.96664
LONRF2	-3.44017	-1.68993	-5.94108	6.08e-08	1.56e-06	7.96555
ZSCAN18	-2.42316	1.69779	-5.92916	6.4e-08	1.64e-06	7.91605
SH2D5	3.52148	2.77618	5.92872	6.41e-08	1.64e-06	7.91424
OAS3	2.24431	7.58258	5.92491	6.52e-08	1.67e-06	7.89843
PTCH2	-2.2076	-0.890491	-5.92389	6.55e-08	1.67e-06	7.89417
LHX5	3.25625	-0.716554	5.92071	6.64e-08	1.69e-06	7.88098
ZNF43	-2.14306	0.911329	-5.92044	6.65e-08	1.69e-06	7.87985
FOXL2	3.08926	-0.0473575	5.91031	6.94e-08	1.76e-06	7.83788
KHDC1L	3.50525	-0.103489	5.90902	6.98e-08	1.77e-06	7.83251
RCHY1	-0.879604	3.51065	-5.90891	6.98e-08	1.77e-06	7.83208
NCMAP	-3.29006	-1.77923	-5.9039	7.14e-08	1.8e-06	7.81129
PRKN	-2.41892	-0.456419	-5.9036	7.14e-08	1.8e-06	7.81006
NEFL	3.70872	4.11919	5.90327	7.15e-08	1.8e-06	7.80871
PDIA4	0.896927	7.73291	5.89781	7.32e-08	1.84e-06	7.78606
CIDEA	-3.82272	-1.09211	-5.89729	7.34e-08	1.84e-06	7.78394
KAT2B	-1.843	4.06346	-5.89573	7.39e-08	1.85e-06	7.77746
ALKBH7	-1.20684	4.27545	-5.89571	7.39e-08	1.85e-06	7.77738
CA6	-3.71393	-2.45208	-5.89492	7.42e-08	1.85e-06	7.77409
KCNAB1	-1.62742	0.489743	-5.8941	7.44e-08	1.85e-06	7.77071
SLC26A6	1.03966	3.52225	5.89405	7.44e-08	1.85e-06	7.77052
CKAP5	0.853236	7.01247	5.89135	7.53e-08	1.87e-06	7.75934
ZNF662	-2.56364	0.16584	-5.88059	7.89e-08	1.95e-06	7.71482
NRIP3	2.10524	2.02303	5.88032	7.9e-08	1.95e-06	7.71369
STK3	0.747289	4.96991	5.87652	8.02e-08	1.98e-06	7.69797
NEIL3	1.90584	1.92487	5.87416	8.11e-08	2e-06	7.68822
CHTF18	1.28542	3.94623	5.87231	8.17e-08	2.01e-06	7.68057
PHLDB2	1.66652	6.03878	5.86869	8.3e-08	2.04e-06	7.66561
PLBD2	0.91655	6.63247	5.86649	8.38e-08	2.05e-06	7.65651
RCC2	0.9318	7.96113	5.86602	8.39e-08	2.05e-06	7.65456
MTHFD1L	1.43408	5.18398	5.86464	8.44e-08	2.06e-06	7.64887
ALDH6A1	-1.41181	3.64599	-5.85861	8.67e-08	2.11e-06	7.62395
DNA2	1.16808	2.40873	5.85791	8.69e-08	2.11e-06	7.62107
ABL2	1.25389	5.45849	5.85739	8.71e-08	2.12e-06	7.61892
CKAP2	1.19473	5.72614	5.85479	8.81e-08	2.13e-06	7.60819
BLM	1.19057	3.27427	5.85476	8.81e-08	2.13e-06	7.60805
AMOT	-3.28602	1.82874	-5.8529	8.88e-08	2.15e-06	7.60036
ADAMTS14	2.01552	2.29679	5.85054	8.97e-08	2.16e-06	7.59064
SH3BGR	-2.3959	0.747369	-5.84907	9.03e-08	2.17e-06	7.58455
MMS22L	1.14026	3.88168	5.84336	9.25e-08	2.22e-06	7.561
PHF10	-0.698269	5.20492	-5.84204	9.3e-08	2.23e-06	7.55556
FMO5	-1.8181	0.243867	-5.83842	9.45e-08	2.26e-06	7.54062
ADAMTS7	2.1538	2.72894	5.83599	9.55e-08	2.28e-06	7.53059
HSPB6	-3.80453	1.57871	-5.83565	9.56e-08	2.28e-06	7.5292
RMND5B	-1.16513	4.76873	-5.83446	9.61e-08	2.29e-06	7.5243
NFIA	-1.11441	5.15938	-5.83102	9.75e-08	2.32e-06	7.51012
MTURN	-1.4535	4.08498	-5.82884	9.84e-08	2.34e-06	7.50113
P4HA1	1.5779	5.59852	5.82786	9.88e-08	2.34e-06	7.49711
SAE1	0.690286	6.76427	5.82528	9.99e-08	2.37e-06	7.48648
STK10	1.06801	5.19139	5.82194	1.01e-07	2.4e-06	7.47269
NGLY1	-0.682148	3.96369	-5.8217	1.01e-07	2.4e-06	7.47173
ME3	-1.99396	0.880575	-5.81895	1.03e-07	2.42e-06	7.4604
PLEKHB1	-2.79853	0.335677	-5.81838	1.03e-07	2.42e-06	7.45804
CCT6B	-1.47594	-0.0552952	-5.81657	1.04e-07	2.44e-06	7.45058
CTTNBP2	-3.30965	0.0720625	-5.81172	1.06e-07	2.48e-06	7.4306
INMT	-2.4005	0.339268	-5.80783	1.08e-07	2.52e-06	7.4146
TBC1D31	0.971596	2.95363	5.80596	1.09e-07	2.54e-06	7.40692
HOMER3	1.47877	5.28561	5.80054	1.11e-07	2.59e-06	7.3846
NUDT4	-0.840329	4.33915	-5.79957	1.12e-07	2.6e-06	7.38062
MUC7	-7.07759	-1.25704	-5.79514	1.14e-07	2.64e-06	7.36239
GMPS	0.801261	6.65613	5.79429	1.14e-07	2.65e-06	7.3589
ACAT1	-1.13677	4.621	-5.79164	1.15e-07	2.67e-06	7.34804
PLOD1	1.272	7.25451	5.79059	1.16e-07	2.68e-06	7.34371
HROB	1.31112	2.75565	5.78983	1.16e-07	2.69e-06	7.34059
FXYD5	1.62825	6.80729	5.78923	1.17e-07	2.69e-06	7.33812
SPRY4	1.58828	4.42072	5.78705	1.18e-07	2.71e-06	7.32915
KIAA1211L	-1.8344	2.5948	-5.7841	1.19e-07	2.74e-06	7.31703
MT-ND5	-1.59104	10.2503	-5.78085	1.21e-07	2.77e-06	7.30369
FAM91A1	0.75091	6.15267	5.77948	1.21e-07	2.78e-06	7.29806
CBX7	-1.5965	3.4206	-5.77095	1.26e-07	2.88e-06	7.26304
SPC24	1.57781	3.13489	5.76458	1.29e-07	2.96e-06	7.23692
LDHD	-2.42902	2.14728	-5.76003	1.32e-07	3.01e-06	7.21823
HTN1	-4.05761	-3.28554	-5.75966	1.32e-07	3.01e-06	7.21673
PLEKHA6	-2.20714	2.43041	-5.75694	1.34e-07	3.04e-06	7.20557
PRKD2	0.722576	6.17748	5.75509	1.35e-07	3.06e-06	7.19798
WNT7A	3.08325	2.32314	5.75506	1.35e-07	3.06e-06	7.19787
MIEF2	-0.986439	3.27017	-5.75416	1.35e-07	3.06e-06	7.19416
ALDH1L1	-3.9149	1.00961	-5.74973	1.38e-07	3.12e-06	7.176
CHDH	-2.81607	0.160798	-5.74894	1.38e-07	3.12e-06	7.17276
ATP13A5	-3.60257	-1.49996	-5.74476	1.41e-07	3.17e-06	7.15565
RALGPS1	-1.4961	1.90686	-5.74398	1.41e-07	3.18e-06	7.15247
EPHX2	-2.15709	3.39646	-5.74271	1.42e-07	3.19e-06	7.14724
TSPAN12	-2.20424	0.879436	-5.74011	1.44e-07	3.22e-06	7.13663
TSGA10	-1.38178	0.540426	-5.73965	1.44e-07	3.22e-06	7.13473
SHC1	0.906956	7.44219	5.73962	1.44e-07	3.22e-06	7.1346
ZNF281	1.02149	4.32978	5.73763	1.45e-07	3.24e-06	7.12645
PNPLA2	-0.950179	5.51865	-5.73533	1.47e-07	3.27e-06	7.11705
VWA5A	-1.90027	3.83169	-5.73433	1.47e-07	3.27e-06	7.11297
MAD2L1	1.31541	4.53739	5.73342	1.48e-07	3.28e-06	7.10921
COL1A2	3.08609	10.3628	5.72858	1.51e-07	3.34e-06	7.08941
ACOT7	1.32457	6.12733	5.72483	1.53e-07	3.39e-06	7.0741
RFWD3	0.936648	5.67246	5.72378	1.54e-07	3.4e-06	7.0698
FEN1	1.15097	5.41994	5.72147	1.55e-07	3.43e-06	7.06035
DDAH2	-1.36319	4.44043	-5.71683	1.59e-07	3.49e-06	7.04136
PADI2	-3.08771	2.88177	-5.71558	1.59e-07	3.51e-06	7.03626
EZH1	-0.835072	3.77138	-5.71505	1.6e-07	3.51e-06	7.0341
FAAP24	1.0094	2.03236	5.71385	1.61e-07	3.52e-06	7.02921
FITM2	-1.10154	3.16676	-5.71348	1.61e-07	3.52e-06	7.02766
CYRIB	0.773422	6.36037	5.70867	1.64e-07	3.59e-06	7.00802
SMC4	1.35819	5.96519	5.70726	1.65e-07	3.61e-06	7.00228
SSBP2	-1.57763	3.34762	-5.70573	1.66e-07	3.62e-06	6.99604
MSN	1.25065	9.57473	5.70535	1.66e-07	3.62e-06	6.99448
ACACB	-2.09712	2.28745	-5.70412	1.67e-07	3.64e-06	6.98944
GANAB	0.686918	8.68177	5.69825	1.72e-07	3.72e-06	6.96549
CDC25B	1.49168	7.03684	5.69782	1.72e-07	3.72e-06	6.96371
EMCN	-1.9721	1.69886	-5.69711	1.72e-07	3.73e-06	6.96084
OSBPL3	1.05952	5.0932	5.69296	1.75e-07	3.79e-06	6.94389
PCLAF	1.64643	4.31568	5.688	1.79e-07	3.86e-06	6.92366
LRRC15	3.65507	4.30411	5.68639	1.8e-07	3.88e-06	6.9171
WIF1	-4.27624	-1.87318	-5.68634	1.8e-07	3.88e-06	6.91688
GAST	3.34912	-0.521543	5.68612	1.81e-07	3.88e-06	6.91599
NAAA	-1.26136	3.67501	-5.68392	1.82e-07	3.91e-06	6.90704
OIP5	1.33735	1.79481	5.68128	1.84e-07	3.95e-06	6.89626
SRSF8	-0.874747	5.20371	-5.68034	1.85e-07	3.96e-06	6.89241
SLC13A2	-3.43388	-2.43841	-5.67867	1.86e-07	3.98e-06	6.88563
PARP12	1.36986	5.82092	5.67794	1.87e-07	3.98e-06	6.88265
GPRASP1	-1.9796	0.462269	-5.67758	1.87e-07	3.98e-06	6.88117
CSRNP1	-1.2859	5.20782	-5.67528	1.89e-07	4.02e-06	6.8718
UBE2T	1.25366	3.47263	5.67066	1.93e-07	4.09e-06	6.85299
OAS2	2.18453	7.13489	5.66682	1.96e-07	4.15e-06	6.83734
GINS2	1.34299	3.85962	5.66276	1.99e-07	4.22e-06	6.82081
NIPA1	1.04208	4.60146	5.65649	2.05e-07	4.32e-06	6.7953
CA8	-2.75971	-2.04308	-5.65561	2.05e-07	4.33e-06	6.79171
PPM1L	-2.10895	3.56285	-5.64965	2.11e-07	4.44e-06	6.76748
BORCS7	-0.880317	3.47673	-5.64346	2.16e-07	4.55e-06	6.7423
SYNGR1	-2.49859	3.25257	-5.64315	2.17e-07	4.55e-06	6.74104
PLA2G12A	-0.744843	4.47825	-5.64102	2.19e-07	4.58e-06	6.73238
ACYP2	-1.10476	2.63087	-5.63926	2.2e-07	4.61e-06	6.72525
GABRP	-4.48468	1.07774	-5.63139	2.28e-07	4.76e-06	6.69326
HMGB3	1.05459	5.53143	5.63076	2.28e-07	4.76e-06	6.69071
ACSS2	-1.05503	5.39017	-5.62963	2.29e-07	4.78e-06	6.68612
XPO1	0.592103	7.3516	5.62828	2.31e-07	4.8e-06	6.68064
PPDPFL	-2.94374	-3.31601	-5.62723	2.32e-07	4.8e-06	6.67638
PAIP2B	-2.0433	2.79572	-5.62709	2.32e-07	4.8e-06	6.67579
SHROOM3	-2.18562	3.86511	-5.62694	2.32e-07	4.8e-06	6.67518
MYLK3	-3.07457	-1.7584	-5.6258	2.33e-07	4.82e-06	6.67058
ANP32E	0.6686	5.86197	5.62132	2.37e-07	4.91e-06	6.6524
CYP11A1	-3.02357	-1.39892	-5.62041	2.38e-07	4.92e-06	6.64871
LRRN4CL	-2.49075	-0.115822	-5.61966	2.39e-07	4.93e-06	6.64564
FAM171A1	-2.09271	2.53461	-5.61818	2.41e-07	4.95e-06	6.63966
IL17RD	-1.73451	2.54551	-5.61529	2.44e-07	5e-06	6.62792
CORO1C	0.901218	7.75744	5.61469	2.44e-07	5.01e-06	6.62551
SYN2	-2.87754	-1.61917	-5.61414	2.45e-07	5.01e-06	6.62327
MCEE	-1.1081	2.55661	-5.61375	2.45e-07	5.01e-06	6.62169
SMIM10L2A	-2.48745	-0.125947	-5.61363	2.45e-07	5.01e-06	6.62119
SAR1B	-0.827553	5.59541	-5.61266	2.46e-07	5.02e-06	6.61725
TMC5	-3.00792	0.751211	-5.61254	2.46e-07	5.02e-06	6.61677
INF2	0.927394	6.87463	5.60955	2.5e-07	5.07e-06	6.60466
TMEM59	-0.699836	7.46353	-5.60922	2.5e-07	5.07e-06	6.60332
HELLS	1.29801	3.83355	5.60846	2.51e-07	5.08e-06	6.60025
CA3	-4.71847	-0.469187	-5.60629	2.53e-07	5.12e-06	6.59142
CENPL	0.908214	2.92527	5.60295	2.57e-07	5.18e-06	6.5779
BARX2	-2.48618	4.68362	-5.60261	2.57e-07	5.18e-06	6.57651
FAM83A	2.95673	7.70314	5.60235	2.57e-07	5.18e-06	6.57547
MAZ	0.595027	5.69816	5.60223	2.57e-07	5.18e-06	6.57498
MCM5	1.1197	6.38422	5.60034	2.59e-07	5.21e-06	6.56733
ZNF415	-2.37148	-0.199132	-5.59697	2.63e-07	5.28e-06	6.55369
SRGAP2	0.787989	4.78576	5.59478	2.66e-07	5.32e-06	6.54483
CKMT2	-3.55958	-0.433578	-5.59397	2.66e-07	5.33e-06	6.54153
PRR27	-3.66492	-3.6154	-5.59127	2.7e-07	5.38e-06	6.5306
RPL3	-0.871227	10.5209	-5.59108	2.7e-07	5.38e-06	6.52984
DELE1	-0.717457	4.79828	-5.58747	2.74e-07	5.46e-06	6.51522
RPL10A	-0.812372	8.86732	-5.58583	2.76e-07	5.48e-06	6.50857
ALAD	-0.806712	5.24249	-5.58581	2.76e-07	5.48e-06	6.50849
FNDC3B	1.27915	6.47383	5.58096	2.81e-07	5.59e-06	6.4889
PYGM	-4.14589	-0.158342	-5.5786	2.84e-07	5.63e-06	6.47934
SPRY2	-1.58045	3.57451	-5.57616	2.87e-07	5.68e-06	6.46949
SPINDOC	1.01371	4.11954	5.57598	2.87e-07	5.68e-06	6.46875
COBL	-3.48581	2.36177	-5.57581	2.88e-07	5.68e-06	6.46808
CCNG1	-1.12447	5.4227	-5.57553	2.88e-07	5.68e-06	6.46695
MET	1.33834	6.51456	5.57436	2.89e-07	5.7e-06	6.46222
BPIFA1	-4.47291	-2.47645	-5.574	2.9e-07	5.7e-06	6.46073
GALNS	1.08649	4.84189	5.57271	2.91e-07	5.72e-06	6.45554
ZNF135	-2.10225	-0.699617	-5.57178	2.92e-07	5.73e-06	6.45179
PPP1R12B	-1.79364	4.39592	-5.56958	2.95e-07	5.78e-06	6.4429
TNRC18	0.755217	6.93175	5.56897	2.96e-07	5.79e-06	6.44041
SLC34A2	-4.70956	-0.357853	-5.56809	2.97e-07	5.8e-06	6.43685
SMPD4	0.591448	6.09152	5.56439	3.02e-07	5.88e-06	6.42191
BTC	-2.55996	-0.324741	-5.56145	3.05e-07	5.95e-06	6.41004
PTPRH	2.67132	1.65087	5.56072	3.06e-07	5.96e-06	6.40708
CDK6	1.45754	6.65043	5.56011	3.07e-07	5.96e-06	6.40464
TNFRSF11A	-1.71472	1.94448	-5.5593	3.08e-07	5.98e-06	6.40135
RPL14	-0.996834	8.29701	-5.55814	3.1e-07	6e-06	6.39667
ASAP1	1.02735	5.71507	5.55276	3.17e-07	6.13e-06	6.37498
ESCO2	1.54396	2.68938	5.55173	3.18e-07	6.14e-06	6.3708
KNSTRN	0.966569	4.26654	5.54899	3.22e-07	6.21e-06	6.35974
DVL3	0.8057	6.89232	5.54871	3.22e-07	6.21e-06	6.35863
ARHGEF39	1.48321	2.22309	5.54582	3.26e-07	6.27e-06	6.34696
MAP3K14	-1.14824	3.91568	-5.54519	3.27e-07	6.28e-06	6.34441
DCT	-3.05235	-2.89548	-5.54168	3.32e-07	6.36e-06	6.33029
OAT	-0.899273	6.40076	-5.54079	3.33e-07	6.38e-06	6.32668
C2orf88	-2.11963	0.0924787	-5.53951	3.35e-07	6.41e-06	6.32153
PLEK2	2.06106	5.7055	5.53701	3.38e-07	6.46e-06	6.31145
FBXO45	1.12514	5.7951	5.5367	3.39e-07	6.46e-06	6.31019
KBTBD3	-1.15188	0.89234	-5.5348	3.42e-07	6.51e-06	6.30255
BRCA2	1.41814	3.25443	5.53388	3.43e-07	6.52e-06	6.29885
FNDC4	-1.82088	1.93879	-5.5322	3.45e-07	6.56e-06	6.29208
PARN	0.592958	5.71189	5.53054	3.48e-07	6.59e-06	6.28538
GPR153	1.67795	5.52761	5.53044	3.48e-07	6.59e-06	6.28498
FIG4	-0.847694	3.54159	-5.53031	3.48e-07	6.59e-06	6.28448
SLC44A3	-1.8494	2.35566	-5.5291	3.5e-07	6.6e-06	6.27958
SLC44A1	0.946653	7.47022	5.52908	3.5e-07	6.6e-06	6.27949
DNMT1	1.05819	6.63335	5.52852	3.51e-07	6.61e-06	6.27726
MGME1	0.762932	4.71544	5.52761	3.52e-07	6.63e-06	6.27361
GLG1	0.682689	7.74059	5.52523	3.56e-07	6.68e-06	6.26399
VIT	-3.22646	0.00670252	-5.52191	3.6e-07	6.77e-06	6.25064
PMEPA1	1.93094	6.36511	5.51897	3.65e-07	6.83e-06	6.23883
ABHD14B	-1.09607	5.00262	-5.51895	3.65e-07	6.83e-06	6.23873
EYA2	-3.16412	2.54705	-5.51469	3.72e-07	6.95e-06	6.22158
CSRP1	-0.807109	7.34364	-5.51109	3.77e-07	7.04e-06	6.2071
MIPEP	-0.801988	4.02118	-5.51091	3.77e-07	7.04e-06	6.2064
SGO2	1.37113	3.3938	5.50766	3.83e-07	7.13e-06	6.1933
INTS8	0.676528	5.09367	5.50707	3.84e-07	7.14e-06	6.19095
TPT1	-0.981568	11.1202	-5.50537	3.86e-07	7.18e-06	6.18413
MUC5B	-6.06468	-0.0765325	-5.5034	3.89e-07	7.22e-06	6.17621
COL4A5	1.83088	5.65086	5.50322	3.9e-07	7.22e-06	6.17549
NCS1	1.06709	6.12838	5.50203	3.92e-07	7.25e-06	6.17069
ADAMTSL2	1.51857	1.93891	5.50122	3.93e-07	7.26e-06	6.16743
SCARA3	-1.79869	4.1694	-5.50006	3.95e-07	7.29e-06	6.16279
B4GALNT1	2.63078	2.26461	5.49784	3.99e-07	7.35e-06	6.15387
ADA	1.49794	4.42121	5.49735	3.99e-07	7.35e-06	6.15188
JADE1	-1.12787	3.71047	-5.49329	4.06e-07	7.47e-06	6.13557
APBA2	1.99087	2.13577	5.49127	4.1e-07	7.52e-06	6.12747
CAMSAP2	0.749783	6.29945	5.48765	4.16e-07	7.62e-06	6.11296
IGF2BP1	4.44626	0.121078	5.48759	4.16e-07	7.62e-06	6.11272
MAPKAPK3	-1.03484	5.75114	-5.48596	4.19e-07	7.66e-06	6.10617
FAM83H	1.50783	8.13847	5.4842	4.22e-07	7.71e-06	6.0991
ADAMTS6	1.89281	0.240216	5.48352	4.23e-07	7.72e-06	6.09637
ARHGAP20	-2.16151	0.295199	-5.4809	4.28e-07	7.8e-06	6.08586
EIF4E3	-1.49447	3.93027	-5.47677	4.35e-07	7.92e-06	6.06929
RPP14	-0.756527	3.84921	-5.47218	4.44e-07	8.06e-06	6.0509
NNAT	-2.27561	-0.453886	-5.47106	4.46e-07	8.09e-06	6.04641
COL11A1	4.30423	4.05395	5.46664	4.54e-07	8.23e-06	6.02869
SAMD5	-2.72578	1.29514	-5.46637	4.55e-07	8.23e-06	6.02761
SCRN1	1.22156	6.54148	5.46491	4.57e-07	8.27e-06	6.02179
FN1	3.11069	9.43584	5.46217	4.63e-07	8.35e-06	6.01078
CYP4X1	-3.10584	1.34619	-5.46123	4.64e-07	8.38e-06	6.00703
OSR1	-2.72943	0.119563	-5.45876	4.69e-07	8.45e-06	5.99714
COX7A1	-2.39869	1.79689	-5.45402	4.79e-07	8.61e-06	5.97816
ZWILCH	0.928026	4.48167	5.4511	4.84e-07	8.7e-06	5.9665
NACC1	0.774346	6.61818	5.45017	4.86e-07	8.73e-06	5.96276
MEIS1	-1.5151	3.17996	-5.44938	4.88e-07	8.73e-06	5.95962
TM7SF2	-2.46596	3.83211	-5.44934	4.88e-07	8.73e-06	5.95945
SIAE	-1.29039	4.24481	-5.44765	4.91e-07	8.78e-06	5.95268
EN1	3.3341	1.73633	5.44725	4.92e-07	8.78e-06	5.95107
SLAIN1	-2.15957	-0.192703	-5.44716	4.92e-07	8.78e-06	5.95072
XPO5	0.770178	6.19824	5.44638	4.94e-07	8.8e-06	5.94761
RAD21	0.662181	7.7976	5.44445	4.98e-07	8.86e-06	5.9399
FRZB	-2.60442	0.989896	-5.44326	5e-07	8.89e-06	5.93512
PRH1	-2.43073	-2.67846	-5.44106	5.05e-07	8.96e-06	5.92632
EMC1	0.757763	6.53469	5.43983	5.08e-07	9e-06	5.92144
F10	-2.24752	-0.632379	-5.43824	5.11e-07	9.04e-06	5.91506
PEX19	-0.557619	5.5261	-5.4364	5.15e-07	9.1e-06	5.9077
ZNF471	-2.39323	-0.475266	-5.43494	5.18e-07	9.15e-06	5.90186
BRIP1	1.49491	3.04742	5.42897	5.31e-07	9.36e-06	5.87802
IBSP	2.93251	-0.77223	5.42588	5.38e-07	9.47e-06	5.8657
SGO1	1.48887	2.06772	5.42579	5.38e-07	9.47e-06	5.86533
NPRL2	-0.946933	3.10461	-5.42422	5.42e-07	9.52e-06	5.85908
ATAD5	1.11922	2.8393	5.42304	5.44e-07	9.55e-06	5.85436
PTTG1	1.57654	5.27228	5.422	5.47e-07	9.58e-06	5.85019
SLC7A8	1.75461	7.3419	5.42156	5.48e-07	9.59e-06	5.84845
CAPS	-1.88146	1.58343	-5.41978	5.52e-07	9.63e-06	5.84135
PIEZO1	0.847872	7.38942	5.41978	5.52e-07	9.63e-06	5.84135
DUSP28	-1.0129	0.975817	-5.41801	5.56e-07	9.69e-06	5.8343
PAFAH2	-0.804008	3.80409	-5.41756	5.57e-07	9.7e-06	5.8325
MARK1	0.896849	4.22856	5.41675	5.59e-07	9.72e-06	5.82927
ZNF425	-1.41021	0.707417	-5.41299	5.68e-07	9.86e-06	5.81427
PIMREG	1.65946	2.4917	5.41192	5.7e-07	9.89e-06	5.81
PIK3CD	1.2023	4.88382	5.41104	5.72e-07	9.92e-06	5.80649
PTPN12	0.875055	6.62292	5.40645	5.83e-07	1.01e-05	5.78818
NRP2	1.47346	6.24637	5.40512	5.86e-07	1.01e-05	5.78289
MED15	0.949642	7.08633	5.40398	5.89e-07	1.02e-05	5.77834
RFC4	1.20277	4.1824	5.40347	5.9e-07	1.02e-05	5.77634
PIFO	-2.17903	-1.04814	-5.39518	6.11e-07	1.05e-05	5.74332
ITGA11	2.92769	3.25148	5.39415	6.14e-07	1.06e-05	5.7392
OSCP1	-1.18244	1.59759	-5.39262	6.18e-07	1.06e-05	5.7331
LRRC8C	1.42706	4.79253	5.39226	6.18e-07	1.06e-05	5.73166
RETSAT	-0.955172	5.84987	-5.39	6.24e-07	1.07e-05	5.72269
GOT1	-0.922176	5.69458	-5.3899	6.25e-07	1.07e-05	5.72228
CISH	-1.32605	3.60463	-5.38944	6.26e-07	1.07e-05	5.72046
SAP130	0.539189	5.13182	5.38794	6.3e-07	1.08e-05	5.71449
NDUFA5	-0.854047	5.0122	-5.38709	6.32e-07	1.08e-05	5.7111
COL6A3	2.76354	8.53612	5.38511	6.37e-07	1.09e-05	5.70322
IFI6	2.70774	7.50076	5.38451	6.39e-07	1.09e-05	5.70085
SCGB3A1	-4.60714	-1.70765	-5.38421	6.39e-07	1.09e-05	5.69966
MYH11	-3.16003	3.69366	-5.38309	6.42e-07	1.09e-05	5.69519
PTGDS	-2.28545	3.01614	-5.3807	6.49e-07	1.1e-05	5.68569
ENPP4	-2.53431	1.04361	-5.37983	6.51e-07	1.1e-05	5.68225
SLC3A2	1.04627	8.43959	5.37967	6.52e-07	1.1e-05	5.68161
PRKAA2	-3.66383	0.000216893	-5.3787	6.54e-07	1.11e-05	5.67773
STK40	-0.967951	5.68412	-5.37741	6.58e-07	1.11e-05	5.67263
RECQL4	1.45096	4.3551	5.37708	6.59e-07	1.11e-05	5.67129
KRT35	-2.53652	-3.69465	-5.37672	6.6e-07	1.11e-05	5.66988
GNB5	0.839147	4.73714	5.37611	6.61e-07	1.11e-05	5.66745
AK9	-1.1689	1.28299	-5.3759	6.62e-07	1.11e-05	5.66662
SLCO4C1	-2.67124	-1.87418	-5.37464	6.65e-07	1.12e-05	5.66161
COQ8A	-1.76109	4.33406	-5.37439	6.66e-07	1.12e-05	5.6606
GABARAP	-0.668461	5.34475	-5.37297	6.7e-07	1.12e-05	5.65496
DLX1	2.42068	1.0202	5.36493	6.92e-07	1.16e-05	5.62304
SLC15A3	1.79947	5.05858	5.35996	7.07e-07	1.18e-05	5.60329
IL34	-2.40318	1.8354	-5.35958	7.08e-07	1.18e-05	5.60181
UCN2	1.96365	1.23147	5.35872	7.1e-07	1.18e-05	5.59839
BEND7	-2.30412	0.348921	-5.35814	7.12e-07	1.19e-05	5.59606
DARS2	0.755959	4.92255	5.35726	7.15e-07	1.19e-05	5.59258
FAM221A	-1.98981	-0.0409861	-5.35016	7.36e-07	1.22e-05	5.56441
TP63	1.44198	8.87586	5.34862	7.41e-07	1.23e-05	5.55833
ATP6V0E2	-1.9412	2.20248	-5.34684	7.46e-07	1.24e-05	5.55126
TJP3	-3.04597	1.56621	-5.34635	7.48e-07	1.24e-05	5.54932
CCL11	2.90814	0.0159825	5.34542	7.51e-07	1.24e-05	5.54564
MPZ	-2.08831	-0.336541	-5.3448	7.52e-07	1.24e-05	5.54317
CACNA2D2	-1.71632	-0.418444	-5.34363	7.56e-07	1.25e-05	5.53854
CDH3	1.87719	8.87221	5.34304	7.58e-07	1.25e-05	5.53621
PLOD3	1.43197	5.78379	5.34252	7.6e-07	1.25e-05	5.53413
SHMT1	-1.18718	5.01892	-5.34071	7.65e-07	1.26e-05	5.52696
ACP6	-1.52516	1.99909	-5.3403	7.67e-07	1.26e-05	5.52536
CSF2	3.10846	-0.320723	5.33762	7.75e-07	1.27e-05	5.51474
DTX3L	1.16703	6.85129	5.33193	7.93e-07	1.3e-05	5.49221
PROM1	-4.29688	-1.1265	-5.33139	7.95e-07	1.3e-05	5.49006
SACM1L	-0.637627	4.69363	-5.32855	8.05e-07	1.31e-05	5.47881
SLC52A2	0.972547	6.1466	5.32789	8.07e-07	1.32e-05	5.4762
FBXO9	-0.783175	5.08089	-5.32788	8.07e-07	1.32e-05	5.47618
GINS4	1.30508	2.83976	5.3275	8.08e-07	1.32e-05	5.47465
GNPDA1	0.664894	5.32503	5.3273	8.09e-07	1.32e-05	5.47388
NTF3	-2.5641	-1.00046	-5.31994	8.34e-07	1.35e-05	5.44477
AGO2	0.918216	6.18114	5.31655	8.45e-07	1.37e-05	5.43134
SEMA3G	-1.78635	1.99055	-5.31596	8.47e-07	1.37e-05	5.42903
LAMC1	1.20718	7.7181	5.31532	8.5e-07	1.38e-05	5.42649
WDR54	1.51959	3.72104	5.31492	8.51e-07	1.38e-05	5.42492
CKS1B	1.11785	4.766	5.31185	8.62e-07	1.39e-05	5.41278
SCIN	-2.30776	1.62324	-5.31038	8.67e-07	1.4e-05	5.40698
PSMD11	0.641975	7.23231	5.31009	8.68e-07	1.4e-05	5.40584
FXYD1	-2.36269	-1.31156	-5.31001	8.68e-07	1.4e-05	5.40551
R3HDM1	0.598084	5.09933	5.30841	8.74e-07	1.4e-05	5.39917
SCP2	-0.775839	6.34621	-5.30815	8.75e-07	1.4e-05	5.39818
RTN4R	1.40471	2.75147	5.30795	8.76e-07	1.4e-05	5.39737
POLD1	0.964873	5.16447	5.30663	8.81e-07	1.41e-05	5.39215
ZNF469	2.45186	3.5003	5.30318	8.93e-07	1.43e-05	5.37854
CMPK1	-0.669931	7.06462	-5.30174	8.98e-07	1.44e-05	5.37287
ZNF554	-1.16153	1.22545	-5.30153	8.99e-07	1.44e-05	5.37201
CNTFR	-3.13448	-0.378583	-5.29866	9.1e-07	1.45e-05	5.36068
FCER1A	-2.77298	0.751906	-5.29853	9.1e-07	1.45e-05	5.36017
SBSPON	-2.5188	0.249789	-5.29839	9.11e-07	1.45e-05	5.35963
FBN2	3.35911	3.6319	5.29012	9.42e-07	1.5e-05	5.32701
UBE2Z	0.515522	7.19426	5.28799	9.51e-07	1.51e-05	5.31861
KRT32	-2.64483	-1.88502	-5.28648	9.57e-07	1.52e-05	5.31263
TCP11L1	0.923124	3.57739	5.28581	9.59e-07	1.52e-05	5.31
BPIFB2	-5.99809	-1.80995	-5.28283	9.71e-07	1.54e-05	5.29825
DBF4B	1.05226	2.60222	5.28205	9.74e-07	1.54e-05	5.29519
TREM2	1.97635	3.24555	5.28015	9.82e-07	1.55e-05	5.28769
OGFRL1	-1.2182	5.43601	-5.27475	1e-06	1.58e-05	5.26642
LY6K	2.18197	3.9144	5.27292	1.01e-06	1.59e-05	5.25922
APOBEC3B	1.88553	3.65729	5.27287	1.01e-06	1.59e-05	5.25903
H2AC11	1.71725	0.659655	5.27069	1.02e-06	1.6e-05	5.25047
STX1A	1.42604	2.03778	5.26832	1.03e-06	1.62e-05	5.24111
HNMT	-1.7064	2.48728	-5.26714	1.04e-06	1.62e-05	5.23649
MAOB	-3.02661	2.23366	-5.26706	1.04e-06	1.62e-05	5.23617
SLC16A7	-2.43313	3.23909	-5.26584	1.04e-06	1.63e-05	5.23137
PTPRK	0.944306	6.62207	5.26295	1.05e-06	1.65e-05	5.21999
NDUFAF3	-0.696415	4.78316	-5.26135	1.06e-06	1.66e-05	5.21372
SLC24A2	2.62883	-0.321072	5.25706	1.08e-06	1.68e-05	5.19684
VSIG1	1.74788	0.196518	5.25541	1.09e-06	1.69e-05	5.19036
CHST2	2.18184	5.29463	5.25445	1.09e-06	1.7e-05	5.18659
IL11RA	-1.49091	1.88317	-5.25425	1.09e-06	1.7e-05	5.18578
CBX3	0.658627	7.13922	5.25298	1.1e-06	1.7e-05	5.18081
DNAH1	-1.47028	1.19352	-5.25209	1.1e-06	1.71e-05	5.17731
TUSC2	-0.774689	3.80518	-5.25173	1.1e-06	1.71e-05	5.17587
CBX2	1.68631	4.00207	5.25105	1.11e-06	1.71e-05	5.1732
GDF10	-2.74604	-1.52107	-5.24931	1.11e-06	1.72e-05	5.16636
ST6GALNAC6	-0.726077	5.30005	-5.24823	1.12e-06	1.73e-05	5.16214
CBLB	1.12559	4.78782	5.24803	1.12e-06	1.73e-05	5.16135
CA13	-1.90486	1.79145	-5.24667	1.13e-06	1.74e-05	5.15601
MTARC2	-1.89131	1.25342	-5.24637	1.13e-06	1.74e-05	5.15483
TEDC1	1.21992	3.71107	5.24535	1.13e-06	1.74e-05	5.15082
MLPH	-2.57277	1.35427	-5.24482	1.13e-06	1.74e-05	5.14876
PIF1	1.46479	1.48124	5.24125	1.15e-06	1.77e-05	5.13472
OASL	2.79025	4.68493	5.23854	1.16e-06	1.78e-05	5.1241
PPP1R18	0.955868	6.61705	5.23446	1.18e-06	1.81e-05	5.1081
IGSF10	-3.19824	0.30654	-5.23233	1.19e-06	1.83e-05	5.09972
ROM1	-1.08421	0.983764	-5.23199	1.2e-06	1.83e-05	5.0984
HTR7	2.49742	2.56386	5.22793	1.22e-06	1.86e-05	5.08247
JOSD1	0.671291	6.33159	5.22472	1.23e-06	1.88e-05	5.06991
CX3CR1	-2.31093	0.257657	-5.22409	1.24e-06	1.88e-05	5.06743
STAT1	1.61632	8.70639	5.22263	1.24e-06	1.89e-05	5.06171
CALCOCO1	-1.00802	5.52419	-5.22145	1.25e-06	1.9e-05	5.05709
MICB	1.72203	2.63055	5.22138	1.25e-06	1.9e-05	5.05682
STARD4	1.25968	4.10911	5.21994	1.26e-06	1.91e-05	5.05117
PVR	0.990259	5.50551	5.21766	1.27e-06	1.92e-05	5.04226
BTD	-0.862802	3.14194	-5.21754	1.27e-06	1.92e-05	5.04176
RUVBL1	0.823975	6.02134	5.21695	1.27e-06	1.92e-05	5.03947
ALG3	0.920108	5.92657	5.21594	1.28e-06	1.93e-05	5.0355
TMEM50B	-0.803971	4.31821	-5.21401	1.29e-06	1.94e-05	5.02795
ASB8	-0.892326	4.46546	-5.21203	1.3e-06	1.96e-05	5.0202
UFC1	-0.707876	5.75593	-5.20995	1.31e-06	1.97e-05	5.01205
NPPC	-2.87211	-2.37223	-5.20832	1.32e-06	1.98e-05	5.00566
RAD54B	1.0243	1.19396	5.20794	1.32e-06	1.98e-05	5.00421
ANO10	-0.962037	4.7953	-5.20428	1.34e-06	2.01e-05	4.98986
SAT2	-0.8495	4.06388	-5.20277	1.35e-06	2.02e-05	4.98397
REPIN1	-1.19934	5.02411	-5.20152	1.35e-06	2.03e-05	4.97909
ITGA3	1.70472	8.7672	5.1982	1.37e-06	2.05e-05	4.96609
PCBD2	-0.910275	2.45525	-5.19773	1.38e-06	2.05e-05	4.96425
KLHL5	0.950609	4.91476	5.19765	1.38e-06	2.05e-05	4.96395
AKTIP	-0.902752	4.03325	-5.19257	1.4e-06	2.09e-05	4.94409
SLC26A2	-1.41876	4.41762	-5.19222	1.41e-06	2.1e-05	4.94272
ZNF862	-1.3597	1.8189	-5.19178	1.41e-06	2.1e-05	4.94101
VCPIP1	0.606883	5.1318	5.19088	1.41e-06	2.1e-05	4.93748
STX6	0.707271	6.29506	5.1898	1.42e-06	2.11e-05	4.93326
S100A1	-3.25063	1.28339	-5.18906	1.42e-06	2.11e-05	4.9304
DCLRE1B	0.904311	3.79071	5.18784	1.43e-06	2.12e-05	4.92562
ARHGEF1	0.725711	6.62415	5.18739	1.43e-06	2.12e-05	4.92385
DDAH1	-1.79091	2.70813	-5.18333	1.46e-06	2.16e-05	4.908
MSH6	0.701537	5.93297	5.1791	1.48e-06	2.19e-05	4.89151
ADGRE2	1.60275	2.92358	5.17659	1.5e-06	2.21e-05	4.88172
RGS19	0.76929	4.0369	5.17636	1.5e-06	2.21e-05	4.88083
OLFML2A	1.46882	5.71033	5.1762	1.5e-06	2.21e-05	4.8802
CHN1	1.59002	3.01387	5.17576	1.5e-06	2.21e-05	4.87849
NUP62	0.621348	6.38709	5.17314	1.52e-06	2.23e-05	4.86825
RPL9	-0.977726	8.10869	-5.17081	1.53e-06	2.25e-05	4.85918
PTK2	0.724588	6.75435	5.17041	1.54e-06	2.25e-05	4.8576
B3GALT5	-3.61407	-0.625286	-5.16614	1.56e-06	2.29e-05	4.84098
PXN	1.24268	7.28443	5.16401	1.58e-06	2.31e-05	4.83266
BDH2	-1.06095	3.09685	-5.16172	1.59e-06	2.33e-05	4.82374
FAM111A	0.945385	4.84577	5.16085	1.6e-06	2.33e-05	4.82037
ABCC1	1.29641	7.18555	5.16026	1.6e-06	2.34e-05	4.81807
CELSR1	1.18281	7.38707	5.16007	1.6e-06	2.34e-05	4.81734
KIF9	-1.06514	1.48464	-5.15816	1.62e-06	2.35e-05	4.80988
RAF1	-0.576397	6.25794	-5.15773	1.62e-06	2.35e-05	4.80822
NID1	2.16248	5.88315	5.15635	1.63e-06	2.36e-05	4.80284
CENPM	1.20157	3.0559	5.15556	1.63e-06	2.37e-05	4.79975
MSANTD3	0.815074	4.68828	5.15547	1.63e-06	2.37e-05	4.79941
ASAP3	-1.48543	4.45622	-5.15531	1.63e-06	2.37e-05	4.79878
RBL1	0.882992	4.0467	5.15251	1.65e-06	2.39e-05	4.78789
MPC2	-0.861443	4.57152	-5.15121	1.66e-06	2.4e-05	4.78283
ARPC1B	1.11653	7.37873	5.14949	1.67e-06	2.42e-05	4.77615
IQCN	-2.04306	-0.484302	-5.1463	1.7e-06	2.45e-05	4.76373
C6orf58	-4.37399	-1.97796	-5.14589	1.7e-06	2.45e-05	4.76214
EIF3L	-0.792165	7.06194	-5.14281	1.72e-06	2.47e-05	4.75016
KIRREL1	1.2699	6.05742	5.14275	1.72e-06	2.47e-05	4.74992
RNASEH2A	1.10708	4.8876	5.14116	1.73e-06	2.49e-05	4.74377
FSTL3	1.7521	4.80042	5.14109	1.73e-06	2.49e-05	4.74347
DCD	-2.77757	-3.89925	-5.14069	1.73e-06	2.49e-05	4.74194
IL1A	3.23767	4.17408	5.14051	1.74e-06	2.49e-05	4.74123
NOP53	-0.947212	7.48948	-5.14004	1.74e-06	2.49e-05	4.7394
GNA13	0.642599	6.18769	5.1389	1.75e-06	2.5e-05	4.73498
TOR4A	2.08377	4.61454	5.1382	1.75e-06	2.5e-05	4.73225
ATOH8	-1.82412	0.286026	-5.13255	1.79e-06	2.56e-05	4.71029
PTPN1	0.725704	6.62284	5.13229	1.79e-06	2.56e-05	4.70927
KIT	-2.37852	2.11689	-5.13093	1.8e-06	2.57e-05	4.70401
CRY2	-0.913214	4.6648	-5.13016	1.81e-06	2.57e-05	4.70103
ACAN	2.39394	1.07896	5.13013	1.81e-06	2.57e-05	4.70091
FAM172A	-1.01803	3.75071	-5.12884	1.82e-06	2.58e-05	4.6959
N4BP3	-1.25767	3.43522	-5.12804	1.83e-06	2.59e-05	4.69277
HOXB9	3.00175	-1.34328	5.12429	1.85e-06	2.62e-05	4.67824
NPDC1	-1.52851	3.69107	-5.1242	1.85e-06	2.62e-05	4.67789
SERPINA5	-2.65626	-1.67217	-5.12288	1.86e-06	2.64e-05	4.67276
TDO2	2.57658	1.28396	5.12201	1.87e-06	2.64e-05	4.66939
NOX4	1.96739	1.51879	5.1218	1.87e-06	2.64e-05	4.66856
VWA2	-2.37412	0.664758	-5.11982	1.89e-06	2.66e-05	4.66091
ZNF568	-1.89352	0.50105	-5.11869	1.9e-06	2.67e-05	4.65652
SLC2A6	1.6646	2.29129	5.11839	1.9e-06	2.67e-05	4.65534
SMC2	1.10974	5.54935	5.11817	1.9e-06	2.67e-05	4.65449
COL2A1	2.73642	-0.624656	5.11664	1.91e-06	2.68e-05	4.64857
TUG1	0.573598	6.96696	5.11622	1.91e-06	2.69e-05	4.64695
AATF	0.755268	6.19124	5.11382	1.93e-06	2.71e-05	4.63762
EEF1B2	-0.90845	7.75476	-5.11183	1.95e-06	2.73e-05	4.62993
DDX60L	1.6524	4.69552	5.10971	1.97e-06	2.75e-05	4.62168
H3C10	1.98726	1.36129	5.10871	1.97e-06	2.76e-05	4.61783
ALDH1A1	-3.40927	3.51677	-5.10866	1.97e-06	2.76e-05	4.61763
EEF1A1	-0.800128	11.7712	-5.10327	2.02e-06	2.81e-05	4.59675
SRC	0.914774	6.42428	5.10323	2.02e-06	2.81e-05	4.59661
MMP10	3.4343	4.66439	5.10292	2.02e-06	2.81e-05	4.59542
LMBRD1	-0.759354	5.06899	-5.0988	2.05e-06	2.86e-05	4.57943
ACSL1	-1.55275	6.52845	-5.09813	2.06e-06	2.86e-05	4.57684
TMEM189	0.823141	6.32405	5.09644	2.07e-06	2.88e-05	4.57032
COX7C	-0.883828	6.95904	-5.09364	2.1e-06	2.91e-05	4.55947
CYP27B1	2.21497	2.82097	5.09209	2.11e-06	2.92e-05	4.55349
STAC2	-3.23532	-1.36755	-5.09194	2.11e-06	2.92e-05	4.55291
LONRF1	-1.22718	3.33113	-5.0916	2.12e-06	2.92e-05	4.55159
TAPT1	-0.796278	3.59383	-5.09123	2.12e-06	2.93e-05	4.55014
ZFP92	1.88488	0.482165	5.0907	2.12e-06	2.93e-05	4.54812
OGFR	0.724008	5.7058	5.08891	2.14e-06	2.95e-05	4.54118
SLX4	0.792579	3.46004	5.08796	2.15e-06	2.96e-05	4.53753
GRAMD2B	-1.1407	3.72583	-5.08722	2.15e-06	2.96e-05	4.53464
VIRMA	0.508671	6.07321	5.08691	2.16e-06	2.96e-05	4.53346
PSRC1	1.25387	2.81671	5.08619	2.16e-06	2.97e-05	4.53068
CYP27A1	-2.22843	2.86458	-5.08413	2.18e-06	2.99e-05	4.52272
PCDHGC5	3.30093	1.12538	5.0819	2.2e-06	3.01e-05	4.5141
CFAP69	-1.15177	0.042912	-5.08164	2.2e-06	3.01e-05	4.51309
FZD6	0.986428	6.44838	5.08066	2.21e-06	3.02e-05	4.50932
MASTL	0.832095	4.10955	5.08017	2.21e-06	3.03e-05	4.50742
HACL1	-0.885177	3.2567	-5.07857	2.23e-06	3.04e-05	4.50122
STK17A	1.12454	6.04737	5.07843	2.23e-06	3.04e-05	4.5007
MYO9B	0.761137	6.53779	5.07829	2.23e-06	3.04e-05	4.50015
SLC20A1	1.12127	5.73619	5.07781	2.24e-06	3.04e-05	4.49831
CSE1L	0.666429	7.26078	5.07525	2.26e-06	3.07e-05	4.48839
SOX12	1.17293	4.32938	5.07518	2.26e-06	3.07e-05	4.48814
GPR158	3.27193	0.768979	5.07371	2.27e-06	3.09e-05	4.48248
CCM2	1.03059	6.02422	5.07129	2.3e-06	3.11e-05	4.47313
SLC9A4	-2.88599	-1.83547	-5.0702	2.31e-06	3.12e-05	4.46891
THSD1	1.61793	4.26645	5.06922	2.31e-06	3.13e-05	4.46512
ISCU	-0.647393	5.40108	-5.06889	2.32e-06	3.13e-05	4.46387
NCOA7	-1.1905	6.093	-5.06786	2.33e-06	3.14e-05	4.4599
CHI3L2	-3.29774	2.33672	-5.06587	2.35e-06	3.17e-05	4.45223
FYCO1	-1.16479	5.53852	-5.06556	2.35e-06	3.17e-05	4.45103
MAP4K4	0.807717	7.65503	5.06485	2.36e-06	3.17e-05	4.44828
ASB11	-2.61003	-3.18207	-5.06369	2.37e-06	3.18e-05	4.44379
PRKDC	1.00923	8.23621	5.06367	2.37e-06	3.18e-05	4.44371
ANAPC16	-0.738127	6.03208	-5.06143	2.39e-06	3.21e-05	4.43511
NDUFA4	-0.80748	6.60057	-5.05848	2.42e-06	3.24e-05	4.42371
MGLL	-1.66048	6.15419	-5.05821	2.42e-06	3.24e-05	4.42267
UGGT1	0.628287	6.60036	5.05793	2.42e-06	3.24e-05	4.42159
MANSC1	-2.05414	4.11951	-5.0579	2.42e-06	3.24e-05	4.42149
MLYCD	-0.930368	2.98516	-5.05772	2.42e-06	3.24e-05	4.42078
ZNF829	-1.89747	-0.254147	-5.05762	2.43e-06	3.24e-05	4.42039
SLC11A2	-0.890297	5.33027	-5.0565	2.44e-06	3.25e-05	4.41609
SH3BP1	1.14466	6.15726	5.05599	2.44e-06	3.26e-05	4.41413
GKAP1	-1.71522	-0.204668	-5.05519	2.45e-06	3.26e-05	4.41105
ACAA1	-1.02901	5.09662	-5.05428	2.46e-06	3.27e-05	4.40753
CSN3	-2.9052	-3.58684	-5.05355	2.47e-06	3.28e-05	4.40471
CCL28	-2.68582	2.39974	-5.05092	2.49e-06	3.31e-05	4.39457
AP2M1	0.821083	8.9112	5.05091	2.49e-06	3.31e-05	4.39455
IKBIP	0.933638	4.20292	5.04876	2.51e-06	3.33e-05	4.38625
AAK1	0.642558	5.56851	5.04839	2.52e-06	3.33e-05	4.38485
MYO7A	1.45541	2.71457	5.04764	2.52e-06	3.34e-05	4.38195
TMEM150C	-1.81403	1.82133	-5.04762	2.53e-06	3.34e-05	4.3819
ATP6V1C2	-2.46753	2.06024	-5.04449	2.56e-06	3.38e-05	4.36984
FMC1	-1.09356	1.72664	-5.04296	2.57e-06	3.39e-05	4.36394
BPIFB1	-5.30247	-0.855849	-5.0428	2.57e-06	3.39e-05	4.36332
PLLP	-1.73119	2.7105	-5.04016	2.6e-06	3.43e-05	4.35317
NUP155	0.772306	5.59138	5.03938	2.61e-06	3.43e-05	4.35016
RNF217	0.783743	5.2241	5.03879	2.62e-06	3.44e-05	4.34789
MAN1C1	-1.75391	1.99922	-5.03874	2.62e-06	3.44e-05	4.34772
GMPPB	-0.756397	4.32214	-5.03857	2.62e-06	3.44e-05	4.34706
TSPOAP1	-2.06892	0.908133	-5.03717	2.63e-06	3.45e-05	4.34168
ZNF439	-1.43131	0.0333416	-5.03648	2.64e-06	3.46e-05	4.33903
AGT	-2.74259	0.439426	-5.03393	2.67e-06	3.49e-05	4.32922
LMOD1	-2.27962	1.96131	-5.03328	2.67e-06	3.5e-05	4.32673
RNASE10	3.36751	-0.664512	5.03245	2.68e-06	3.5e-05	4.32354
SEC11C	-1.12496	4.38064	-5.03231	2.69e-06	3.5e-05	4.32299
APBB1	-1.57628	2.63787	-5.03195	2.69e-06	3.51e-05	4.32159
SENP5	0.748056	5.32705	5.03135	2.7e-06	3.51e-05	4.31931
PARM1	-1.99973	3.19823	-5.03053	2.7e-06	3.52e-05	4.31613
TBC1D10B	0.458208	6.13568	5.03051	2.7e-06	3.52e-05	4.31606
GJB3	1.97535	6.74181	5.02907	2.72e-06	3.53e-05	4.31055
FNDC1	3.27626	3.89929	5.02864	2.73e-06	3.54e-05	4.30887
RCN3	2.08996	4.37612	5.02624	2.75e-06	3.57e-05	4.29966
MCF2L	-1.91893	3.02419	-5.02532	2.76e-06	3.58e-05	4.29614
LRP12	1.21745	4.5579	5.02465	2.77e-06	3.58e-05	4.29356
ENTPD7	1.37726	4.50541	5.02256	2.79e-06	3.61e-05	4.28554
CPSF3	0.554189	5.50751	5.02019	2.82e-06	3.64e-05	4.27642
EIF4EBP3	-1.92113	0.652831	-5.01882	2.83e-06	3.66e-05	4.27119
ADAM10	0.873238	6.90779	5.01828	2.84e-06	3.66e-05	4.26909
DOP1B	-1.05319	4.83688	-5.01795	2.84e-06	3.67e-05	4.26783
CPT2	-0.680564	4.34026	-5.01695	2.86e-06	3.68e-05	4.26401
TNFRSF9	1.81768	1.96077	5.01608	2.87e-06	3.69e-05	4.26066
CDO1	-2.75666	-1.27565	-5.01504	2.88e-06	3.7e-05	4.25667
SHKBP1	0.64807	6.19888	5.0143	2.89e-06	3.71e-05	4.25384
AP5Z1	0.729953	5.11599	5.00998	2.94e-06	3.76e-05	4.23726
LHX1	3.368	-0.307477	5.00991	2.94e-06	3.76e-05	4.23697
RBPMS	-1.35615	3.77924	-5.00984	2.94e-06	3.76e-05	4.23671
ADCY7	1.29966	4.34585	5.0095	2.94e-06	3.76e-05	4.2354
MKRN2OS	-1.88635	-0.234411	-5.00949	2.94e-06	3.76e-05	4.23539
BAIAP2L2	2.30106	3.1101	5.00805	2.96e-06	3.78e-05	4.22986
TBL1XR1	0.740556	7.14331	5.00347	3.01e-06	3.85e-05	4.2123
MISP3	-1.7298	0.706991	-5.00006	3.06e-06	3.89e-05	4.19926
ABCA5	-1.10612	3.37357	-4.99829	3.08e-06	3.92e-05	4.19245
CRADD	-0.731139	2.80946	-4.9974	3.09e-06	3.93e-05	4.18905
GORASP1	-0.568622	4.95378	-4.99715	3.09e-06	3.93e-05	4.18808
COL6A1	2.08445	8.6378	4.99522	3.12e-06	3.96e-05	4.1807
SLC25A12	-0.788102	4.61535	-4.99085	3.17e-06	4.02e-05	4.16399
CCDC125	-1.1975	2.69411	-4.9898	3.18e-06	4.04e-05	4.15996
MYO5C	-2.32222	2.53223	-4.9884	3.2e-06	4.06e-05	4.15459
ARID3A	1.0207	3.3762	4.9841	3.26e-06	4.12e-05	4.13814
ZNF737	-2.10994	-0.506346	-4.98329	3.27e-06	4.13e-05	4.13506
CRYL1	-1.27283	3.61533	-4.98287	3.27e-06	4.14e-05	4.13347
CERCAM	1.78783	5.55459	4.97779	3.34e-06	4.22e-05	4.11403
PTPRN2	-1.68971	1.18567	-4.97614	3.36e-06	4.24e-05	4.10771
RBM20	-2.15286	-0.76722	-4.97596	3.36e-06	4.24e-05	4.10703
SLC25A26	-0.683222	3.69895	-4.97359	3.4e-06	4.28e-05	4.09799
MYL5	-1.2415	2.13344	-4.97306	3.4e-06	4.28e-05	4.09594
CCT5	0.835699	8.07414	4.97254	3.41e-06	4.29e-05	4.09396
ANO8	-1.03481	3.14104	-4.97091	3.43e-06	4.31e-05	4.08775
EPHB2	2.20949	4.16821	4.96995	3.45e-06	4.32e-05	4.0841
MAP4K2	1.00196	4.27802	4.96737	3.48e-06	4.36e-05	4.07424
CYP2J2	-2.0109	1.9589	-4.96595	3.5e-06	4.39e-05	4.06883
MGP	-2.79452	4.36397	-4.96484	3.52e-06	4.4e-05	4.06457
SLC25A4	-2.10507	3.70436	-4.9622	3.55e-06	4.44e-05	4.05451
STK4	0.631191	5.45204	4.9613	3.57e-06	4.46e-05	4.05108
PHKG1	-2.23389	-0.49974	-4.96033	3.58e-06	4.47e-05	4.04738
TLCD4	-2.57447	0.645333	-4.95971	3.59e-06	4.48e-05	4.04499
TOX2	1.77567	2.43718	4.95916	3.6e-06	4.48e-05	4.04289
XRCC3	1.03563	3.67006	4.95816	3.61e-06	4.5e-05	4.0391
CDK5R1	1.62877	4.22584	4.95771	3.62e-06	4.5e-05	4.03737
CAVIN2	-1.8845	2.48022	-4.95733	3.62e-06	4.5e-05	4.03593
CAD	0.920543	6.26505	4.95718	3.63e-06	4.5e-05	4.03535
MARCHF3	-1.50369	1.57368	-4.95614	3.64e-06	4.52e-05	4.03138
S100B	-1.99753	2.25487	-4.95387	3.67e-06	4.55e-05	4.02274
PTN	-2.78252	2.51641	-4.9532	3.68e-06	4.56e-05	4.02018
MT-ND1	-1.38699	10.4281	-4.9514	3.71e-06	4.59e-05	4.01334
PLAAT3	-2.06544	2.30431	-4.94983	3.73e-06	4.62e-05	4.00734
TMTC3	0.89066	5.95898	4.94844	3.76e-06	4.64e-05	4.00203
OMA1	-0.709623	3.17956	-4.94674	3.78e-06	4.66e-05	3.99558
DUSP9	2.74523	1.69356	4.94552	3.8e-06	4.68e-05	3.99092
SLC18B1	-0.945994	3.67255	-4.94546	3.8e-06	4.68e-05	3.99069
FBXL19	0.891917	5.1205	4.94535	3.8e-06	4.68e-05	3.99027
ASAH1	-0.922669	6.44672	-4.94254	3.84e-06	4.72e-05	3.97959
CD109	1.24565	6.75475	4.94241	3.85e-06	4.72e-05	3.97908
SLC35A1	-0.802137	2.3935	-4.94219	3.85e-06	4.72e-05	3.97827
GPR39	2.11225	1.5105	4.94164	3.86e-06	4.73e-05	3.97617
PAEP	2.91588	-0.83951	4.94153	3.86e-06	4.73e-05	3.97575
METTL25	-0.958918	1.56108	-4.94003	3.88e-06	4.75e-05	3.97004
FRY	-1.92862	2.32992	-4.94002	3.88e-06	4.75e-05	3.97001
CKS2	1.35378	4.70122	4.93703	3.93e-06	4.8e-05	3.9586
KIF20B	1.0515	4.39221	4.93667	3.94e-06	4.8e-05	3.95725
RPS8	-0.806476	9.62098	-4.93652	3.94e-06	4.8e-05	3.95668
APOL1	2.20118	7.90518	4.93543	3.95e-06	4.82e-05	3.95254
KREMEN2	2.15599	2.40016	4.93417	3.97e-06	4.84e-05	3.94774
EEF1AKMT1	-0.881604	1.58906	-4.934	3.98e-06	4.84e-05	3.94708
ABI3BP	-2.73783	2.38622	-4.93294	3.99e-06	4.86e-05	3.94306
SOCS1	1.30652	2.7994	4.93212	4.01e-06	4.87e-05	3.93994
ARFGAP1	0.703013	6.00089	4.93163	4.01e-06	4.87e-05	3.93809
NCAPG2	1.03832	4.79543	4.93122	4.02e-06	4.88e-05	3.93653
FUT6	-3.99589	0.896545	-4.92878	4.06e-06	4.92e-05	3.92725
CSGALNACT2	0.98874	4.44837	4.92485	4.12e-06	4.99e-05	3.9123
PRELID3A	1.1596	0.730778	4.92449	4.13e-06	5e-05	3.91096
XPO6	0.683066	6.92342	4.92382	4.14e-06	5e-05	3.90841
TMEM217	-1.37968	0.145991	-4.92073	4.19e-06	5.06e-05	3.89665
TTC19	-0.748604	4.62668	-4.91947	4.21e-06	5.08e-05	3.89188
DMAC2L	-0.686791	3.92009	-4.91947	4.21e-06	5.08e-05	3.89187
P4HTM	-1.38582	2.66642	-4.91936	4.22e-06	5.08e-05	3.89144
LIAS	-0.915916	2.63194	-4.91858	4.23e-06	5.09e-05	3.88848
CAPN13	-3.50854	-1.66605	-4.91683	4.26e-06	5.12e-05	3.88186
MCM6	0.87928	5.82294	4.91511	4.29e-06	5.15e-05	3.87532
RHEBL1	1.34606	0.221186	4.9142	4.3e-06	5.16e-05	3.87188
KCNQ4	-2.01407	-0.461055	-4.91327	4.32e-06	5.18e-05	3.86833
NID2	2.3614	3.39736	4.91222	4.34e-06	5.19e-05	3.86436
DHRS7C	-2.50816	-3.55741	-4.91222	4.34e-06	5.19e-05	3.86434
EGFL6	2.09947	2.93101	4.9122	4.34e-06	5.19e-05	3.86429
IL7R	1.85056	4.76838	4.9121	4.34e-06	5.19e-05	3.86391
TDRD3	-0.773236	3.66633	-4.91169	4.35e-06	5.19e-05	3.86235
TNFRSF4	1.64112	1.34204	4.91108	4.36e-06	5.2e-05	3.86005
PLCB4	-2.56777	0.23169	-4.90794	4.41e-06	5.26e-05	3.84813
PIK3R1	-1.39601	5.31024	-4.90757	4.42e-06	5.26e-05	3.84671
FAT2	1.68793	7.99165	4.90646	4.44e-06	5.28e-05	3.84251
POGLUT2	1.23387	2.53584	4.90578	4.45e-06	5.28e-05	3.83994
SKIL	0.926618	5.9518	4.90578	4.45e-06	5.28e-05	3.83992
TUBB	0.748348	9.56743	4.90577	4.45e-06	5.28e-05	3.8399
IGSF3	1.08339	7.45745	4.9027	4.5e-06	5.34e-05	3.82826
MCM7	1.08694	7.17365	4.89944	4.56e-06	5.41e-05	3.81589
TCAIM	-0.814537	3.77584	-4.89809	4.59e-06	5.43e-05	3.8108
LGR6	-2.54797	0.992808	-4.89711	4.6e-06	5.45e-05	3.80707
TRAF7	0.638732	7.22104	4.89691	4.61e-06	5.45e-05	3.80632
TBX2	1.60674	2.38321	4.8965	4.62e-06	5.45e-05	3.80476
TNXB	-2.52948	2.11055	-4.89278	4.68e-06	5.53e-05	3.79066
AZGP1	-4.50979	1.64134	-4.89078	4.72e-06	5.57e-05	3.7831
IGF1R	1.04018	6.90935	4.88345	4.86e-06	5.73e-05	3.75537
RPL29	-0.939573	8.5463	-4.8822	4.88e-06	5.75e-05	3.75066
WDR53	0.828768	3.66968	4.88208	4.89e-06	5.75e-05	3.75021
FAM219B	-0.845101	3.02514	-4.8809	4.91e-06	5.77e-05	3.74575
POSTN	2.9925	6.98391	4.88039	4.92e-06	5.78e-05	3.7438
RBP4	-3.09268	-1.54609	-4.87442	5.04e-06	5.91e-05	3.72123
HAAO	-1.65909	0.899053	-4.874	5.05e-06	5.91e-05	3.71965
ZMYND11	-0.678941	5.56206	-4.87397	5.05e-06	5.91e-05	3.71954
CCDC9B	-1.70154	3.23165	-4.87241	5.08e-06	5.94e-05	3.71365
CLCNKB	-2.82376	-2.57028	-4.87199	5.09e-06	5.95e-05	3.71205
DRC3	-1.05432	0.59703	-4.86907	5.14e-06	6.01e-05	3.70102
KIAA1324	-2.93307	1.92515	-4.86856	5.15e-06	6.02e-05	3.69911
FAM174B	-1.50362	2.21388	-4.86829	5.16e-06	6.02e-05	3.6981
B3GNT4	1.68366	1.27361	4.86598	5.21e-06	6.07e-05	3.68939
NFIC	-0.924963	6.65182	-4.86226	5.28e-06	6.16e-05	3.67535
PYGL	1.27878	7.60939	4.86033	5.33e-06	6.19e-05	3.66806
NEIL1	-1.53772	0.797775	-4.86029	5.33e-06	6.19e-05	3.6679
PLPP4	2.92746	0.355401	4.85933	5.35e-06	6.21e-05	3.66429
ZBED3	-1.40894	1.84559	-4.85929	5.35e-06	6.21e-05	3.66414
HIBCH	-1.01621	4.65531	-4.85903	5.35e-06	6.21e-05	3.66317
MND1	1.19041	1.62009	4.85862	5.36e-06	6.21e-05	3.6616
DUSP22	-0.777632	5.02441	-4.85858	5.36e-06	6.21e-05	3.66144
DIPK1A	0.988903	3.93952	4.85844	5.36e-06	6.21e-05	3.66095
TGFBR1	0.838033	6.31058	4.85807	5.37e-06	6.21e-05	3.65955
TRPA1	2.25988	-0.832257	4.85761	5.38e-06	6.21e-05	3.65781
FANCE	0.910159	4.3087	4.85745	5.39e-06	6.21e-05	3.65721
MCTP1	1.38141	3.84194	4.85742	5.39e-06	6.21e-05	3.65707
UQCRC2	-0.67186	7.29808	-4.85591	5.42e-06	6.25e-05	3.6514
IFI44	2.0093	5.03827	4.85171	5.51e-06	6.35e-05	3.63557
AHNAK2	1.63892	8.76822	4.8508	5.53e-06	6.36e-05	3.63215
RBP7	-2.29878	0.659952	-4.84797	5.59e-06	6.43e-05	3.62147
KCNIP2	-2.02297	-1.2522	-4.84759	5.6e-06	6.43e-05	3.62005
TMEM231	-1.53528	1.04698	-4.8474	5.6e-06	6.43e-05	3.61933
SLITRK5	-3.13937	-1.61463	-4.84587	5.64e-06	6.47e-05	3.61355
HDGF	0.606552	8.57209	4.84512	5.65e-06	6.48e-05	3.61074
VAMP2	-0.749092	5.0936	-4.84016	5.77e-06	6.6e-05	3.59208
ROR1	-1.85301	1.30755	-4.83776	5.82e-06	6.66e-05	3.58303
LMNB1	1.00035	5.56755	4.83755	5.83e-06	6.66e-05	3.58223
GFRA1	-2.84763	1.19381	-4.83586	5.86e-06	6.7e-05	3.57589
SUCLG1	-0.692213	6.01547	-4.83388	5.91e-06	6.75e-05	3.56843
ARSG	-1.11838	1.93462	-4.83083	5.98e-06	6.82e-05	3.55697
CNOT3	0.536773	5.72299	4.82612	6.09e-06	6.94e-05	3.53929
MRPL34	-0.78914	4.49396	-4.82612	6.09e-06	6.94e-05	3.53928
ATP1B3	1.17037	8.54196	4.825	6.12e-06	6.96e-05	3.53508
CABLES1	-1.42795	2.70215	-4.82183	6.2e-06	7.04e-05	3.52317
ZNF493	-1.83936	0.506065	-4.82174	6.2e-06	7.04e-05	3.52284
NRG1	2.50944	4.9247	4.81949	6.25e-06	7.1e-05	3.51438
MYO15B	-1.55678	1.91085	-4.81859	6.28e-06	7.12e-05	3.51101
APLN	2.12681	2.72117	4.81748	6.3e-06	7.14e-05	3.50683
GPR68	1.66258	4.84354	4.8165	6.33e-06	7.17e-05	3.50316
PKM	0.820422	11.1916	4.81596	6.34e-06	7.18e-05	3.50111
BBOF1	-1.04732	1.44656	-4.81474	6.37e-06	7.2e-05	3.49654
NDRG1	1.73645	10.6965	4.81375	6.4e-06	7.23e-05	3.49284
EIF4G1	0.679131	9.58944	4.81266	6.42e-06	7.25e-05	3.48874
TNFRSF19	-1.92447	3.20304	-4.81149	6.45e-06	7.28e-05	3.48436
FAIM2	-1.97298	-0.543812	-4.81135	6.46e-06	7.28e-05	3.48385
SPCS1	-0.615006	5.7263	-4.80956	6.5e-06	7.32e-05	3.47711
TCF3	0.807401	6.23666	4.80944	6.51e-06	7.32e-05	3.47665
PRKAR2B	-1.78675	1.59057	-4.80922	6.51e-06	7.32e-05	3.47585
ALDH3A2	-0.980928	6.67596	-4.80849	6.53e-06	7.33e-05	3.4731
TMEM63A	-1.03085	4.5356	-4.80843	6.53e-06	7.33e-05	3.47288
DNAH17	3.06605	4.14036	4.80673	6.58e-06	7.38e-05	3.4665
SLCO1B3	3.66661	-0.130296	4.80391	6.65e-06	7.45e-05	3.45595
TTPAL	0.916914	5.27881	4.80343	6.66e-06	7.46e-05	3.45414
MARK3	0.71617	6.50203	4.80292	6.68e-06	7.47e-05	3.45222
HADHB	-0.717889	6.84164	-4.80083	6.73e-06	7.52e-05	3.44439
AMPD1	-3.17945	-1.65763	-4.80077	6.73e-06	7.52e-05	3.44417
TAP2	1.20024	6.05625	4.8004	6.74e-06	7.53e-05	3.4428
MAML3	-1.44635	2.97953	-4.79957	6.76e-06	7.54e-05	3.43968
TAF1A	0.96459	2.15746	4.79834	6.8e-06	7.58e-05	3.43509
MED30	0.694291	3.15555	4.79794	6.81e-06	7.58e-05	3.43358
SCNN1B	-3.24558	3.00932	-4.79781	6.81e-06	7.58e-05	3.4331
CRYZL1	-0.642064	3.21362	-4.79772	6.81e-06	7.58e-05	3.43275
ZNF385D	-2.04736	-0.123881	-4.79716	6.83e-06	7.59e-05	3.43067
MPV17L	-2.61852	0.0523318	-4.79649	6.85e-06	7.6e-05	3.42814
PFDN5	-0.714996	7.02446	-4.79431	6.9e-06	7.66e-05	3.41999
ADHFE1	-2.05516	0.0895355	-4.79375	6.92e-06	7.67e-05	3.41789
TMEM178B	-2.67878	0.152228	-4.79097	7e-06	7.75e-05	3.4075
BTG2	-1.21606	6.52275	-4.79061	7.01e-06	7.75e-05	3.40613
HTN3	-3.32551	-3.52536	-4.79017	7.02e-06	7.76e-05	3.40451
AMIGO1	-1.86378	1.36799	-4.78913	7.05e-06	7.79e-05	3.40061
CDK12	0.721713	6.22053	4.78708	7.1e-06	7.84e-05	3.39292
MARVELD1	1.06417	5.93476	4.78538	7.15e-06	7.89e-05	3.38659
DERL1	0.465504	6.5023	4.78504	7.16e-06	7.89e-05	3.3853
RHBDF2	0.847935	5.91222	4.78396	7.19e-06	7.92e-05	3.38128
SLC19A3	-2.07177	-0.63827	-4.78077	7.28e-06	8.01e-05	3.36936
FOXS1	1.64599	-0.120684	4.77709	7.39e-06	8.12e-05	3.35559
HOXD8	1.3271	1.63378	4.77617	7.41e-06	8.15e-05	3.35215
CAPN5	-1.53059	3.29912	-4.77472	7.46e-06	8.19e-05	3.34673
EPM2AIP1	-0.800527	4.06591	-4.77295	7.51e-06	8.24e-05	3.34015
KATNAL2	-1.70588	-0.450588	-4.77192	7.54e-06	8.27e-05	3.3363
ATP1A2	-4.08412	-0.0672545	-4.77108	7.56e-06	8.29e-05	3.33317
SECISBP2L	-0.985329	4.94317	-4.76945	7.61e-06	8.33e-05	3.32706
SMPDL3A	-1.34535	3.31552	-4.76906	7.62e-06	8.34e-05	3.32562
CLCA2	2.39812	9.11223	4.76622	7.71e-06	8.42e-05	3.31502
PLPP3	-1.58721	4.73397	-4.7661	7.71e-06	8.42e-05	3.31457
SAMD4B	0.546132	7.01048	4.76254	7.82e-06	8.53e-05	3.3013
STXBP6	-2.3933	-0.28175	-4.76249	7.82e-06	8.53e-05	3.30112
TCOF1	0.941961	6.46397	4.75983	7.9e-06	8.61e-05	3.29118
PERM1	-1.5173	2.27619	-4.75279	8.12e-06	8.85e-05	3.26498
ERF	0.734685	5.80962	4.75173	8.16e-06	8.87e-05	3.261
SPARC	1.91695	9.66094	4.75161	8.16e-06	8.87e-05	3.26055
AMY2B	-1.97193	-0.917298	-4.75081	8.18e-06	8.89e-05	3.25758
KIAA0930	0.720124	7.38504	4.74964	8.22e-06	8.93e-05	3.25323
RPL32	-0.917827	8.9195	-4.74867	8.25e-06	8.95e-05	3.24963
NDUFS1	-0.725916	6.36714	-4.74782	8.28e-06	8.97e-05	3.24644
CLSTN1	0.906505	8.87697	4.74779	8.28e-06	8.97e-05	3.24633
TAF2	0.757408	5.42306	4.74714	8.3e-06	8.99e-05	3.24392
SPEF2	-1.65391	-0.372581	-4.74686	8.31e-06	8.99e-05	3.24286
BCAS1	-2.63601	1.3392	-4.74612	8.34e-06	9.01e-05	3.24011
NELL2	3.25159	5.28804	4.74361	8.42e-06	9.09e-05	3.23078
PACC1	0.89035	3.31522	4.74323	8.43e-06	9.1e-05	3.22939
USP4	-0.605935	5.28603	-4.742	8.47e-06	9.13e-05	3.22478
YPEL3	-0.819417	4.551	-4.74152	8.49e-06	9.14e-05	3.223
TLR5	-1.52784	2.60339	-4.74103	8.5e-06	9.16e-05	3.22119
TCTA	-0.926856	3.99397	-4.74042	8.52e-06	9.17e-05	3.21894
DPY19L1	0.829067	4.60558	4.73946	8.56e-06	9.2e-05	3.21534
ARL6IP1	0.593436	7.27921	4.73915	8.57e-06	9.2e-05	3.21418
ZAN	2.53488	-0.935299	4.73799	8.6e-06	9.24e-05	3.20987
HEBP2	-0.908412	5.89478	-4.73732	8.63e-06	9.25e-05	3.20741
GSTK1	-0.956205	6.25072	-4.73685	8.64e-06	9.26e-05	3.20566
APBB2	0.972108	5.20022	4.73501	8.71e-06	9.32e-05	3.1988
MGST2	-1.01114	5.05263	-4.73459	8.72e-06	9.33e-05	3.19723
DDX60	1.91882	5.86896	4.73371	8.75e-06	9.35e-05	3.19396
SLC11A1	1.74049	2.63361	4.73366	8.75e-06	9.35e-05	3.19378
NSD2	0.869324	6.09601	4.73329	8.76e-06	9.36e-05	3.1924
KCNMB1	-1.66005	1.13293	-4.73224	8.8e-06	9.39e-05	3.1885
SGSM2	-0.854242	4.5643	-4.73165	8.82e-06	9.4e-05	3.18632
HDHD2	-0.762183	3.54022	-4.72539	9.04e-06	9.62e-05	3.16308
ENO2	1.90821	4.11002	4.72529	9.04e-06	9.62e-05	3.16271
GSTA1	-4.26265	-0.919084	-4.72486	9.06e-06	9.63e-05	3.16111
EPM2A	-1.05071	1.80428	-4.72399	9.09e-06	9.66e-05	3.15788
KDM5B	0.878798	7.08226	4.72315	9.12e-06	9.68e-05	3.15477
YKT6	0.71976	7.23779	4.71953	9.25e-06	9.81e-05	3.14131
PPOX	-0.755439	2.58799	-4.71949	9.25e-06	9.81e-05	3.14118
TCEA3	-2.04455	3.82391	-4.71926	9.26e-06	9.81e-05	3.14031
AC007906.2	-2.19841	0.210372	-4.71844	9.28e-06	9.83e-05	3.13729
MMRN1	-2.99269	0.889121	-4.71636	9.36e-06	9.91e-05	3.12958
MTFR1	0.70105	5.12092	4.71493	9.41e-06	9.95e-05	3.12428
CHD4	0.486049	8.00708	4.71358	9.46e-06	0.0001	3.11928
MN1	1.41998	4.86197	4.71242	9.5e-06	0.0001	3.11498
DSE	1.14489	6.14947	4.71137	9.54e-06	0.000101	3.11108
TCEAL1	-0.844154	2.6249	-4.70957	9.61e-06	0.000101	3.10441
RPS9	-0.765169	9.13364	-4.70905	9.63e-06	0.000101	3.10246
TFF1	-2.84854	-3.0265	-4.70557	9.76e-06	0.000103	3.0896
PBK	1.40221	3.38947	4.7052	9.78e-06	0.000103	3.08821
AR	-2.35995	0.67223	-4.70215	9.89e-06	0.000104	3.07692
MRPS36	-0.672445	3.6284	-4.70146	9.92e-06	0.000104	3.07435
QPCT	-1.6661	2.03921	-4.69872	1e-05	0.000105	3.06424
ZC2HC1A	-1.15367	2.28038	-4.69791	1.01e-05	0.000105	3.06122
POLA2	0.845567	4.46722	4.69749	1.01e-05	0.000106	3.05968
MFHAS1	1.19085	5.71059	4.69503	1.02e-05	0.000106	3.05059
SPDEF	-3.29614	-1.17672	-4.6922	1.03e-05	0.000108	3.0401
CYP20A1	-0.745259	4.10492	-4.69143	1.03e-05	0.000108	3.03725
CYP4F12	-2.98629	0.426344	-4.68957	1.04e-05	0.000109	3.03041
PLXND1	1.0749	5.97038	4.68627	1.05e-05	0.00011	3.0182
OXR1	-0.778756	5.10914	-4.68513	1.06e-05	0.00011	3.01399
ATXN2L	0.552578	6.89791	4.68128	1.07e-05	0.000112	2.99978
NDUFS7	-0.864465	5.27756	-4.6782	1.09e-05	0.000113	2.9884
LYRM7	-0.790123	3.72002	-4.67796	1.09e-05	0.000113	2.98752
H2BC9	1.5343	-0.0964454	4.67602	1.09e-05	0.000114	2.98034
TMED8	0.610823	4.53924	4.67371	1.1e-05	0.000115	2.97182
TRIM59	1.02794	3.08907	4.67234	1.11e-05	0.000115	2.96677
DTWD1	-0.755693	3.15267	-4.66647	1.14e-05	0.000118	2.94515
ESM1	2.32473	1.76566	4.66455	1.14e-05	0.000119	2.93805
LYRM9	-1.49056	0.493662	-4.66133	1.16e-05	0.00012	2.92618
CAPN7	-0.610112	4.33733	-4.65991	1.16e-05	0.000121	2.92097
VASP	0.652712	6.71013	4.6587	1.17e-05	0.000121	2.91653
PALB2	0.591889	4.31448	4.65797	1.17e-05	0.000121	2.91383
TYMP	1.56433	8.27285	4.6578	1.17e-05	0.000121	2.9132
LCLAT1	0.699227	4.40046	4.65766	1.18e-05	0.000121	2.91269
NIN	0.682736	5.96109	4.65644	1.18e-05	0.000122	2.9082
DSCC1	0.937981	2.72628	4.65281	1.2e-05	0.000123	2.89483
SMIM4	-1.00237	2.22175	-4.65234	1.2e-05	0.000124	2.8931
ZNF707	0.82315	3.44257	4.65167	1.2e-05	0.000124	2.89063
LIFR	-1.76135	2.66281	-4.64877	1.22e-05	0.000125	2.87999
PKIA	-2.35754	2.14886	-4.64681	1.23e-05	0.000126	2.87275
HOXC10	3.45865	0.921632	4.64679	1.23e-05	0.000126	2.87268
NMNAT1	-0.783552	2.90694	-4.64637	1.23e-05	0.000126	2.87114
ACVR2A	-0.947009	3.45928	-4.64614	1.23e-05	0.000126	2.87032
GNPAT	-0.557274	5.32718	-4.6458	1.23e-05	0.000126	2.86904
KANSL1L	-0.856845	2.38909	-4.64401	1.24e-05	0.000127	2.86247
MOGS	0.548837	5.934	4.64229	1.25e-05	0.000128	2.85615
CALR	0.597823	9.93086	4.6416	1.25e-05	0.000128	2.85361
PHC1	-0.999945	1.78824	-4.64037	1.26e-05	0.000128	2.8491
KCTD5	0.671496	5.85095	4.64016	1.26e-05	0.000128	2.84834
TSPAN6	-1.07706	4.98971	-4.63953	1.26e-05	0.000129	2.84603
RAP2B	1.05333	6.8229	4.63942	1.26e-05	0.000129	2.8456
NDC1	0.66951	5.37603	4.63721	1.27e-05	0.00013	2.8375
KLHDC2	-0.619001	4.28875	-4.63707	1.27e-05	0.00013	2.83697
CYSLTR1	-1.68558	0.39684	-4.63328	1.29e-05	0.000131	2.82307
ZNF347	-1.72542	1.03404	-4.63209	1.3e-05	0.000132	2.8187
NTM	1.96977	2.49281	4.6311	1.3e-05	0.000132	2.81508
MGAT4A	-1.43075	3.19059	-4.63106	1.3e-05	0.000132	2.81494
ACTL6A	0.840248	5.96379	4.6283	1.32e-05	0.000134	2.8048
FOXK1	0.886278	6.28887	4.62493	1.33e-05	0.000135	2.79242
TNC	1.96704	9.02542	4.62477	1.33e-05	0.000135	2.79184
ADCY5	-2.38874	0.486158	-4.62395	1.34e-05	0.000136	2.78884
RPL5	-0.731157	9.32557	-4.62229	1.35e-05	0.000136	2.78277
ZNF555	-0.773204	1.54741	-4.62228	1.35e-05	0.000136	2.78273
TAGLN2	0.694123	9.84219	4.61933	1.36e-05	0.000138	2.77192
SAMD9	1.94713	7.20213	4.61864	1.37e-05	0.000138	2.76939
ZFP36	-1.28919	8.19069	-4.61846	1.37e-05	0.000138	2.76872
SUMF1	-0.856204	4.71004	-4.61794	1.37e-05	0.000138	2.76681
MPND	-0.719588	3.5603	-4.61728	1.37e-05	0.000138	2.7644
RAI2	-1.89849	1.35368	-4.61678	1.38e-05	0.000139	2.76258
ZNFX1	1.0132	6.52656	4.6149	1.39e-05	0.000139	2.7557
TEX264	-0.722023	5.10286	-4.61485	1.39e-05	0.000139	2.75553
ANK2	-2.39127	1.46869	-4.61464	1.39e-05	0.000139	2.75473
GREM1	2.47877	4.81156	4.61377	1.39e-05	0.00014	2.75154
SOX15	1.48915	5.77663	4.61293	1.4e-05	0.00014	2.74846
GRB2	0.372293	7.13674	4.61198	1.4e-05	0.000141	2.74501
GPRASP2	-1.17417	2.26231	-4.61149	1.4e-05	0.000141	2.74322
GP2	-2.5416	-3.45406	-4.61046	1.41e-05	0.000141	2.73945
SGK2	-2.34094	-1.99996	-4.6099	1.41e-05	0.000141	2.73738
MT-CYB	-1.30072	10.9412	-4.60932	1.42e-05	0.000142	2.73526
DYNC1H1	0.651281	9.05084	4.60912	1.42e-05	0.000142	2.73455
MDC1	0.749783	4.94354	4.60851	1.42e-05	0.000142	2.73231
PECR	-1.29356	1.69438	-4.60837	1.42e-05	0.000142	2.73181
GALNT17	-1.88475	0.143898	-4.60834	1.42e-05	0.000142	2.73167
ARIH2	-0.530654	5.42258	-4.60735	1.43e-05	0.000142	2.72808
GAS7	-1.6944	4.48093	-4.60412	1.44e-05	0.000144	2.71623
GNAI1	0.970713	5.90201	4.60367	1.45e-05	0.000144	2.71462
LRFN4	1.19057	4.06574	4.60264	1.45e-05	0.000144	2.71085
FAXDC2	-1.93883	2.17638	-4.60059	1.46e-05	0.000145	2.70333
ASPHD2	1.14035	2.55464	4.59985	1.47e-05	0.000146	2.70063
SORT1	-1.34165	5.96045	-4.59954	1.47e-05	0.000146	2.69949
PDIA3	0.622182	8.82804	4.59897	1.47e-05	0.000146	2.69742
PPP1R3C	-2.67503	2.5787	-4.59861	1.48e-05	0.000146	2.6961
MAP6	-1.93125	-0.624596	-4.59625	1.49e-05	0.000147	2.68748
MTERF4	-0.626087	3.82039	-4.59561	1.49e-05	0.000148	2.68514
PLCG1	0.614163	5.80502	4.59544	1.49e-05	0.000148	2.68453
TK2	-0.746381	3.96271	-4.59531	1.49e-05	0.000148	2.68405
MTDH	0.523597	7.36008	4.59342	1.5e-05	0.000149	2.67717
MT-ND3	-1.22128	8.93608	-4.59266	1.51e-05	0.000149	2.67438
KIAA0232	-0.903076	4.92416	-4.59261	1.51e-05	0.000149	2.67421
SNRPN	-1.78584	3.39211	-4.59146	1.52e-05	0.000149	2.67001
SPRY1	-1.25392	4.2016	-4.59125	1.52e-05	0.000149	2.66923
MITF	-1.5679	2.09829	-4.59055	1.52e-05	0.00015	2.66668
SKP2	1.05425	4.91947	4.59014	1.52e-05	0.00015	2.6652
PROC	2.07926	0.25439	4.58984	1.53e-05	0.00015	2.66408
CRKL	0.782014	7.1049	4.58716	1.54e-05	0.000151	2.65432
ZBTB47	-1.13324	3.52716	-4.58589	1.55e-05	0.000152	2.64967
COL4A6	2.36433	4.48064	4.58511	1.55e-05	0.000152	2.64683
LMF1	-1.21686	2.72573	-4.58477	1.56e-05	0.000152	2.64558
TATDN3	-0.617929	2.97363	-4.58475	1.56e-05	0.000152	2.6455
DCAF15	0.590622	5.04653	4.5846	1.56e-05	0.000152	2.64496
RPRM	-2.47417	-1.79188	-4.58365	1.56e-05	0.000153	2.6415
ARL6IP5	-0.919133	6.23732	-4.5828	1.57e-05	0.000153	2.6384
SHISAL1	2.23925	2.66946	4.58206	1.57e-05	0.000154	2.63571
FST	2.02781	5.87952	4.57988	1.58e-05	0.000155	2.62774
DQX1	1.60044	1.99079	4.57973	1.59e-05	0.000155	2.62722
TANC2	0.970914	5.88599	4.57839	1.59e-05	0.000155	2.62232
ACSS3	-2.12687	0.118157	-4.57831	1.59e-05	0.000155	2.62204
GADD45G	-1.84272	1.14804	-4.57691	1.6e-05	0.000156	2.61693
ANGPTL7	-2.72757	-2.19711	-4.57684	1.6e-05	0.000156	2.61669
RC3H2	0.696866	6.1354	4.57603	1.61e-05	0.000156	2.61374
AGTRAP	0.970918	5.9963	4.57442	1.62e-05	0.000157	2.60788
MMP3	3.33718	5.02757	4.5741	1.62e-05	0.000157	2.60669
KCNK5	-1.5998	2.80503	-4.5735	1.62e-05	0.000158	2.60453
RAB17	-2.12669	0.55502	-4.56997	1.65e-05	0.00016	2.59166
ZNF596	-1.02206	0.34232	-4.56868	1.65e-05	0.00016	2.58697
SKA2	0.804143	5.12278	4.56824	1.66e-05	0.00016	2.58538
LRRC8D	0.97786	5.50275	4.56562	1.67e-05	0.000162	2.57582
SLC25A11	-0.643619	5.88464	-4.56423	1.68e-05	0.000163	2.57078
DMBT1	-4.87381	0.0317613	-4.56363	1.69e-05	0.000163	2.56857
KIF22	0.76273	5.70897	4.5632	1.69e-05	0.000163	2.56704
DPP3	0.689473	6.15997	4.56288	1.69e-05	0.000163	2.56585
TNFSF4	1.74307	1.33278	4.56222	1.7e-05	0.000163	2.56346
HIF1A	1.02044	8.44307	4.56161	1.7e-05	0.000164	2.56123
ACLY	0.687872	7.46321	4.55862	1.72e-05	0.000166	2.55036
LUM	2.03661	7.54997	4.55833	1.72e-05	0.000166	2.54933
TMEM92	2.00049	1.46184	4.55313	1.76e-05	0.000169	2.53042
CDC27	0.509622	6.04486	4.55307	1.76e-05	0.000169	2.53022
TEC	-1.42542	1.14491	-4.55157	1.77e-05	0.00017	2.52475
CCDC159	-0.833634	2.25427	-4.55118	1.77e-05	0.00017	2.52334
SMIM5	-2.79348	1.19639	-4.55078	1.77e-05	0.00017	2.52189
ZNF526	0.541096	3.81266	4.54885	1.78e-05	0.000171	2.5149
RAB34	0.75545	5.74138	4.5481	1.79e-05	0.000171	2.51216
CREB3L4	-1.08503	2.73466	-4.54687	1.8e-05	0.000172	2.50768
DNAJB11	0.79227	6.33449	4.54666	1.8e-05	0.000172	2.50695
SEC61A1	0.494552	8.64238	4.54662	1.8e-05	0.000172	2.50679
DSN1	0.766997	4.01749	4.54651	1.8e-05	0.000172	2.50639
SMS	0.784811	6.04152	4.54545	1.81e-05	0.000173	2.50256
BAZ1A	0.685379	6.28712	4.54499	1.81e-05	0.000173	2.50088
NDUFV3	-0.637341	5.01048	-4.54496	1.81e-05	0.000173	2.50078
GIPC2	-2.44112	0.145716	-4.54424	1.82e-05	0.000173	2.49817
HNRNPU	0.468333	8.56087	4.54387	1.82e-05	0.000173	2.49683
SP140L	0.879895	4.17882	4.5437	1.82e-05	0.000173	2.49619
LZTFL1	-0.758442	3.32254	-4.54316	1.82e-05	0.000173	2.49423
MT1M	-2.02014	0.198005	-4.54244	1.83e-05	0.000174	2.49162
GPR161	1.06072	4.09757	4.54236	1.83e-05	0.000174	2.49135
LDOC1	-2.37994	2.52009	-4.54229	1.83e-05	0.000174	2.49108
SLC25A25	-1.26229	4.71806	-4.54179	1.83e-05	0.000174	2.48925
RPS3A	-0.874591	7.968	-4.54091	1.84e-05	0.000174	2.48608
DHRS11	-0.996771	2.69471	-4.53665	1.87e-05	0.000177	2.47063
IRX6	-2.69632	-1.46804	-4.53437	1.89e-05	0.000178	2.46237
EPB41L4A	-1.81023	2.19362	-4.53262	1.9e-05	0.00018	2.45603
TTC38	-0.872003	3.96114	-4.53175	1.9e-05	0.00018	2.45287
P4HA3	2.1964	1.07779	4.5312	1.91e-05	0.00018	2.45089
ARL14EP	-0.604819	3.77604	-4.53116	1.91e-05	0.00018	2.45075
RNF2	0.438862	4.58465	4.53018	1.92e-05	0.000181	2.4472
MYOM1	-2.81915	0.732339	-4.52915	1.92e-05	0.000181	2.44346
CP	-3.21785	1.6557	-4.52902	1.92e-05	0.000181	2.443
KDM1A	0.579098	6.70185	4.528	1.93e-05	0.000182	2.43929
ONECUT2	2.0926	-0.496583	4.522	1.98e-05	0.000186	2.41758
C1QL1	1.9868	-0.120537	4.52166	1.98e-05	0.000186	2.41637
SNTB1	-1.50033	3.10273	-4.5212	1.98e-05	0.000186	2.41471
CALU	0.879443	7.38532	4.51805	2.01e-05	0.000188	2.4033
OXSM	-0.65643	2.63051	-4.518	2.01e-05	0.000188	2.40314
RWDD1	-0.620946	5.16553	-4.51528	2.03e-05	0.00019	2.39327
TMA7	-0.822717	5.34676	-4.51471	2.03e-05	0.00019	2.39122
IFI16	0.812238	7.93439	4.51371	2.04e-05	0.000191	2.38763
SH3GLB1	-0.501554	6.83385	-4.51349	2.04e-05	0.000191	2.38683
ACBD4	-1.1049	1.52669	-4.51327	2.04e-05	0.000191	2.38603
CMTM8	-1.19081	1.44271	-4.51182	2.05e-05	0.000192	2.3808
ZNF433	-1.96313	0.213824	-4.51059	2.06e-05	0.000193	2.37635
SLAMF9	2.61169	-0.478458	4.51047	2.07e-05	0.000193	2.37591
TMC7	1.58562	2.0042	4.51004	2.07e-05	0.000193	2.37437
TCF20	0.720638	6.27037	4.50876	2.08e-05	0.000194	2.36973
ARSI	2.11724	4.34384	4.50794	2.09e-05	0.000194	2.36676
SPATS2	0.690987	4.85635	4.50768	2.09e-05	0.000194	2.36584
TMBIM4	-0.752174	4.47807	-4.50615	2.1e-05	0.000195	2.36033
KRT17	2.34559	12.3447	4.50583	2.1e-05	0.000195	2.35918
LGALS3	-0.862867	7.51149	-4.5056	2.1e-05	0.000195	2.35834
PPP4R4	2.24923	1.43684	4.50354	2.12e-05	0.000197	2.35091
DEFB1	-2.91279	3.6478	-4.50332	2.12e-05	0.000197	2.35011
GULP1	-2.2252	1.6806	-4.50326	2.12e-05	0.000197	2.34988
TMEM168	-0.809234	4.35323	-4.50269	2.13e-05	0.000197	2.34783
IL33	-3.1056	2.90199	-4.50258	2.13e-05	0.000197	2.34743
BMPR1B	1.9156	2.00582	4.50025	2.15e-05	0.000199	2.33905
TMEM104	0.618014	4.7848	4.4997	2.15e-05	0.000199	2.33703
DLX2	2.19132	0.315156	4.49838	2.16e-05	0.000199	2.3323
IFI35	1.3982	5.32943	4.49829	2.16e-05	0.000199	2.33197
TMED3	-0.811116	6.81713	-4.49826	2.16e-05	0.000199	2.33184
SASH1	-1.65282	5.20698	-4.49822	2.16e-05	0.000199	2.33169
GLB1L2	-2.78802	0.934653	-4.49813	2.16e-05	0.000199	2.33139
FKBP14	0.981479	4.34714	4.49556	2.19e-05	0.000201	2.3221
TSPAN10	1.79957	2.63099	4.49435	2.2e-05	0.000202	2.31776
SUGCT	1.55691	2.36125	4.49419	2.2e-05	0.000202	2.31719
PLN	-2.53711	-0.446184	-4.4931	2.21e-05	0.000203	2.31326
INTS10	-0.694993	5.33583	-4.49286	2.21e-05	0.000203	2.31239
AUH	-0.812185	2.91497	-4.48506	2.27e-05	0.000209	2.28429
DGLUCY	-0.923788	4.72788	-4.48501	2.27e-05	0.000209	2.28413
ATP8A1	-1.7994	1.72209	-4.48481	2.28e-05	0.000209	2.2834
TNFRSF12A	1.29846	6.12669	4.48464	2.28e-05	0.000209	2.28279
GFI1	1.57827	0.758028	4.48412	2.28e-05	0.000209	2.28091
WDR31	-1.14986	1.4599	-4.4833	2.29e-05	0.00021	2.27795
CDON	-1.30635	1.79207	-4.48282	2.29e-05	0.00021	2.27624
RBKS	-1.02719	1.5859	-4.48255	2.3e-05	0.00021	2.27526
TMEM8B	-1.4861	2.33952	-4.48222	2.3e-05	0.00021	2.27408
EIF4B	-0.587352	8.12218	-4.48147	2.31e-05	0.00021	2.27139
FADS3	1.45548	3.76323	4.47928	2.32e-05	0.000212	2.2635
SATB1	-1.39195	3.56657	-4.47614	2.35e-05	0.000214	2.2522
ACSF2	-1.11237	3.52203	-4.47597	2.35e-05	0.000214	2.25159
OXNAD1	-0.597729	2.95859	-4.47366	2.37e-05	0.000216	2.2433
COL6A2	1.90353	8.80065	4.47345	2.38e-05	0.000216	2.24255
LHX9	2.4639	-1.4358	4.47133	2.4e-05	0.000218	2.23492
MGST1	-3.86141	2.56586	-4.47062	2.4e-05	0.000218	2.23238
ZGRF1	0.949019	1.91244	4.46887	2.42e-05	0.00022	2.2261
BAK1	0.993262	5.81262	4.46846	2.42e-05	0.00022	2.22461
ZC2HC1C	-1.16403	0.222459	-4.46709	2.43e-05	0.000221	2.21969
EEF2	-0.613332	11.0958	-4.46696	2.44e-05	0.000221	2.21923
TMEM63B	0.677106	6.46399	4.46623	2.44e-05	0.000221	2.21661
C18orf32	-0.71895	1.73621	-4.46469	2.46e-05	0.000222	2.21109
RNF168	0.798443	5.28654	4.46399	2.46e-05	0.000223	2.20858
MUC15	-3.16528	2.4053	-4.46286	2.47e-05	0.000224	2.20452
HIGD1A	-1.00284	5.32476	-4.46147	2.49e-05	0.000225	2.19952
JPT2	0.660447	7.26786	4.46016	2.5e-05	0.000226	2.19483
POLE2	1.02707	2.58593	4.45944	2.51e-05	0.000226	2.19223
HTRA3	2.13208	4.8532	4.45913	2.51e-05	0.000226	2.19112
PTBP1	0.504321	8.28915	4.45893	2.51e-05	0.000226	2.19041
HOXB7	3.05839	1.00853	4.45866	2.51e-05	0.000226	2.18946
PPM1G	0.50065	7.14972	4.45711	2.53e-05	0.000228	2.18388
BBS2	-0.753089	4.20857	-4.45658	2.53e-05	0.000228	2.182
PLOD2	1.3279	5.85495	4.45587	2.54e-05	0.000228	2.17945
CFL1	0.655331	9.94932	4.45521	2.55e-05	0.000229	2.17709
RSAD1	-0.672373	4.04334	-4.45298	2.57e-05	0.00023	2.16908
TMEM38A	-1.90971	1.93358	-4.45239	2.57e-05	0.000231	2.16698
BRK1	-0.692053	6.54279	-4.45031	2.59e-05	0.000233	2.15951
SLC12A2	-1.2134	5.14577	-4.4488	2.61e-05	0.000234	2.15411
GOLGA4	-0.814957	6.43536	-4.4468	2.63e-05	0.000235	2.14696
POFUT1	0.601732	6.23866	4.44612	2.63e-05	0.000236	2.14452
F11R	0.762597	7.51883	4.44581	2.64e-05	0.000236	2.1434
CPSF2	0.445613	6.36517	4.44458	2.65e-05	0.000237	2.13901
BCL2L12	0.835666	4.05763	4.44442	2.65e-05	0.000237	2.13844
MEAK7	1.18116	5.81168	4.44384	2.66e-05	0.000237	2.13636
SCYL3	-0.643883	3.29161	-4.44021	2.69e-05	0.00024	2.12337
AIF1L	-1.77412	4.66612	-4.43963	2.7e-05	0.000241	2.1213
F2RL3	1.36209	1.01518	4.43899	2.71e-05	0.000241	2.119
DCAF7	0.445611	6.67385	4.43427	2.75e-05	0.000245	2.10212
LAMP5	2.3317	1.50483	4.43386	2.76e-05	0.000246	2.10065
RPN1	0.55752	8.38045	4.43349	2.76e-05	0.000246	2.09934
ZADH2	-0.659513	4.46599	-4.43246	2.77e-05	0.000247	2.09566
SPNS2	-1.96537	4.26076	-4.43178	2.78e-05	0.000247	2.09322
CBL	0.759626	5.32844	4.43112	2.79e-05	0.000247	2.09087
LGALS3BP	0.916761	9.37407	4.42918	2.81e-05	0.000249	2.08395
NUDT1	0.94226	4.43154	4.42916	2.81e-05	0.000249	2.08386
MOB3A	0.748182	6.06421	4.42916	2.81e-05	0.000249	2.08386
MEIS2	-1.25492	3.01991	-4.42893	2.81e-05	0.000249	2.08304
HMGXB3	0.517278	5.51124	4.42793	2.82e-05	0.00025	2.07949
FAAH2	-1.44187	2.17421	-4.42687	2.83e-05	0.000251	2.0757
ITGA1	1.43678	4.57055	4.42664	2.84e-05	0.000251	2.07486
KRT9	1.80782	1.0068	4.42618	2.84e-05	0.000251	2.07324
ZNF200	0.663167	3.38998	4.42328	2.87e-05	0.000253	2.06289
NOMO1	0.643546	5.50852	4.42295	2.87e-05	0.000254	2.06168
PRNP	0.995489	8.54476	4.42251	2.88e-05	0.000254	2.06014
CLDN23	-1.41529	1.52022	-4.42073	2.9e-05	0.000255	2.05378
USP31	0.674192	5.05132	4.41833	2.93e-05	0.000258	2.04522
CHPF	0.972269	7.01441	4.41773	2.93e-05	0.000258	2.04307
HOXC4	1.87339	0.0403216	4.41759	2.93e-05	0.000258	2.04258
AQP1	-1.43073	5.85473	-4.41738	2.94e-05	0.000258	2.04181
STRA6	2.67514	2.19283	4.41728	2.94e-05	0.000258	2.04148
ATP13A3	0.87038	6.85883	4.41488	2.96e-05	0.00026	2.03291
ELF5	-3.47249	0.120601	-4.41449	2.97e-05	0.00026	2.03154
SOX11	2.3269	-0.0781239	4.41428	2.97e-05	0.00026	2.03079
RANBP1	0.766123	6.17863	4.41348	2.98e-05	0.000261	2.02793
UBA3	-0.613928	5.07332	-4.41233	2.99e-05	0.000262	2.02383
IL20RB	2.10425	6.38254	4.41161	3e-05	0.000263	2.02124
MAL	-4.19874	2.99159	-4.41006	3.02e-05	0.000264	2.01574
PCDH17	1.64688	2.52247	4.40956	3.02e-05	0.000264	2.01395
TRIOBP	-0.67961	4.13718	-4.40796	3.04e-05	0.000266	2.00825
DIRAS3	-1.67597	-0.045908	-4.40419	3.08e-05	0.000269	1.99485
PKNOX2	-2.05072	-0.105026	-4.40318	3.1e-05	0.00027	1.99123
H3C8	1.78966	-0.592059	4.40213	3.11e-05	0.000271	1.9875
PDIA5	0.869123	4.27337	4.40119	3.12e-05	0.000272	1.98415
TSPYL5	-1.74703	1.58035	-4.40102	3.12e-05	0.000272	1.98356
KNDC1	-2.34162	-0.480755	-4.40061	3.13e-05	0.000272	1.98211
AKAP1	-0.73762	5.57372	-4.40001	3.13e-05	0.000272	1.97995
EFHD1	-1.69577	1.19388	-4.39992	3.13e-05	0.000272	1.97963
ACOX1	-0.677	5.97984	-4.39942	3.14e-05	0.000273	1.97786
SLC19A2	-1.01955	3.53184	-4.39899	3.15e-05	0.000273	1.97635
KCNK1	1.1507	5.33058	4.39878	3.15e-05	0.000273	1.9756
FAM8A1	-0.704346	4.58225	-4.3987	3.15e-05	0.000273	1.97529
DDX11	1.02917	3.94752	4.39824	3.15e-05	0.000273	1.97368
DHX8	0.422286	6.19027	4.39581	3.18e-05	0.000276	1.96504
PXMP4	-1.08727	3.90783	-4.3958	3.18e-05	0.000276	1.96498
DALRD3	-0.645051	3.64072	-4.39523	3.19e-05	0.000276	1.96296
TCN1	-3.87068	2.42676	-4.39439	3.2e-05	0.000277	1.95998
PAX5	2.38611	0.768584	4.39428	3.2e-05	0.000277	1.95959
HPRT1	0.677308	5.19622	4.39407	3.2e-05	0.000277	1.95884
TRIO	0.950121	6.27393	4.39373	3.21e-05	0.000277	1.95763
FOXE1	2.80922	4.72729	4.39249	3.22e-05	0.000278	1.95324
CREG2	2.44776	1.0091	4.39172	3.23e-05	0.000279	1.9505
CAPN3	-1.98676	-0.869147	-4.38979	3.26e-05	0.00028	1.94363
YWHAH	0.457235	6.9884	4.38872	3.27e-05	0.000281	1.93985
HAS3	2.02843	7.23263	4.38866	3.27e-05	0.000281	1.93961
MLXIPL	-2.59376	-1.32864	-4.3878	3.28e-05	0.000282	1.93658
LMF2	0.571563	6.50856	4.38598	3.3e-05	0.000284	1.93011
RERG	-2.3109	0.144517	-4.38565	3.31e-05	0.000284	1.92893
EPC1	-0.598157	4.14672	-4.38453	3.32e-05	0.000285	1.92496
RSAD2	2.59298	4.73065	4.38342	3.33e-05	0.000286	1.92102
GEN1	0.769659	3.86923	4.38295	3.34e-05	0.000286	1.91935
MUC21	-5.07607	0.711813	-4.38124	3.36e-05	0.000288	1.9133
UBA6	0.905968	6.49615	4.38109	3.36e-05	0.000288	1.91276
ZNF697	1.1122	2.80606	4.38049	3.37e-05	0.000288	1.91061
LMO3	-2.42168	-1.83344	-4.38011	3.38e-05	0.000289	1.90928
DBF4	0.87656	3.71748	4.38005	3.38e-05	0.000289	1.90907
SAMD1	0.636029	5.40482	4.3796	3.38e-05	0.000289	1.90747
MISP	2.44325	3.4217	4.37956	3.38e-05	0.000289	1.90732
PLEKHA8	0.613208	3.73512	4.37887	3.39e-05	0.000289	1.90489
MCM8	0.854779	3.86437	4.37646	3.42e-05	0.000292	1.89634
SPARCL1	-1.66884	5.73954	-4.37627	3.42e-05	0.000292	1.89567
MIA	-2.58581	-2.70091	-4.37319	3.46e-05	0.000295	1.88474
SLC19A1	1.02978	3.52579	4.3727	3.47e-05	0.000295	1.88302
TXNL1	-0.598554	5.73917	-4.372	3.48e-05	0.000296	1.88052
NUDT12	-1.07136	2.90491	-4.37187	3.48e-05	0.000296	1.88006
MYH9	0.873951	10.9716	4.37185	3.48e-05	0.000296	1.88
NUP50	0.674435	6.30261	4.37135	3.49e-05	0.000296	1.87824
SLC6A4	-2.65356	-1.29229	-4.37066	3.5e-05	0.000297	1.87579
RECQL	0.739477	4.71463	4.37007	3.5e-05	0.000297	1.87368
MACROD1	-1.46137	3.11556	-4.36992	3.51e-05	0.000297	1.87314
EPSTI1	2.05311	4.8866	4.36982	3.51e-05	0.000297	1.87279
RSRC1	0.682396	4.61676	4.36972	3.51e-05	0.000297	1.87246
EGR1	-1.39532	8.07208	-4.3673	3.54e-05	0.0003	1.86387
GPATCH2	0.558005	3.96215	4.36391	3.59e-05	0.000303	1.85186
XYLT2	0.658754	5.12277	4.36178	3.61e-05	0.000305	1.84433
NLRC5	1.32712	5.85123	4.36163	3.62e-05	0.000305	1.84381
SOD3	-1.60573	2.96424	-4.35956	3.64e-05	0.000308	1.83651
GRAMD1C	-1.55196	1.95122	-4.35446	3.71e-05	0.000313	1.81847
KRT6A	2.61614	13.1436	4.35417	3.72e-05	0.000313	1.81742
TENM3	2.05265	4.00903	4.35379	3.72e-05	0.000314	1.8161
DIP2B	0.909253	6.8824	4.35279	3.74e-05	0.000315	1.81255
MGST3	-0.791404	5.17675	-4.3511	3.76e-05	0.000317	1.80658
ZNF420	-1.57457	1.12514	-4.35023	3.77e-05	0.000317	1.80352
EVA1C	-1.5036	3.61333	-4.34884	3.79e-05	0.000319	1.79862
RNF146	-0.557406	4.03253	-4.34779	3.81e-05	0.00032	1.7949
DYM	-0.542351	5.11747	-4.34741	3.81e-05	0.00032	1.79356
PTPRN	2.50704	-0.749451	4.34639	3.83e-05	0.000321	1.78997
PLEKHG2	0.777185	4.76867	4.34566	3.84e-05	0.000322	1.78737
NCF2	1.21034	4.78221	4.34417	3.86e-05	0.000323	1.78211
OCIAD2	1.01672	5.65609	4.34384	3.86e-05	0.000324	1.78096
PIGR	-4.90387	0.985297	-4.34354	3.87e-05	0.000324	1.77988
ICAM5	1.7317	0.462614	4.34325	3.87e-05	0.000324	1.77888
DUSP23	-1.21008	4.28949	-4.34287	3.88e-05	0.000324	1.77754
NSA2	-0.597731	5.81699	-4.34188	3.89e-05	0.000325	1.77404
LAPTM4B	0.957204	7.08913	4.34159	3.9e-05	0.000325	1.77301
HYKK	-1.04077	0.707896	-4.34135	3.9e-05	0.000326	1.77218
CD80	1.69456	-0.050727	4.34092	3.91e-05	0.000326	1.77064
BOP1	1.02143	6.587	4.34025	3.92e-05	0.000326	1.7683
ANG	-1.33787	1.14349	-4.34009	3.92e-05	0.000326	1.76772
AJUBA	1.22066	6.20488	4.34005	3.92e-05	0.000326	1.76758
SNTB2	0.580304	5.50419	4.33955	3.93e-05	0.000327	1.76584
QSOX2	0.850487	4.3427	4.33901	3.93e-05	0.000327	1.76393
PROCR	1.3846	4.60973	4.33823	3.95e-05	0.000328	1.76118
CCL2	-1.82887	4.02644	-4.33732	3.96e-05	0.000329	1.75798
ABCB1	-1.58636	0.41138	-4.3347	4e-05	0.000332	1.74874
ZNF280D	-0.654748	4.11742	-4.33411	4.01e-05	0.000332	1.74665
SFRP1	-3.25501	4.58953	-4.33331	4.02e-05	0.000333	1.74381
RGS20	2.07752	2.67344	4.33235	4.03e-05	0.000334	1.74045
ABRAXAS1	-0.860795	2.09621	-4.33216	4.04e-05	0.000334	1.73976
PARD3B	-1.54476	2.04067	-4.33207	4.04e-05	0.000334	1.73946
PM20D1	-2.22019	-2.81869	-4.33051	4.06e-05	0.000336	1.73398
PARP1	0.564333	7.26484	4.32923	4.08e-05	0.000337	1.72947
RRAS2	0.819338	4.98354	4.32908	4.08e-05	0.000337	1.72894
PGF	1.60281	4.90192	4.32884	4.09e-05	0.000337	1.72808
RPS23	-0.726776	8.57383	-4.32855	4.09e-05	0.000338	1.72707
TOPBP1	0.839272	5.56225	4.32823	4.1e-05	0.000338	1.72592
KRT7	-2.94932	3.69189	-4.32713	4.11e-05	0.000339	1.72205
SPRED3	1.3082	1.00547	4.32664	4.12e-05	0.000339	1.72034
DDIT4	1.44717	7.15509	4.32652	4.12e-05	0.000339	1.71993
SEMA7A	1.1238	3.835	4.32544	4.14e-05	0.000341	1.71613
UBE2L6	1.14908	6.99656	4.32403	4.16e-05	0.000342	1.71117
CCDC88A	0.917196	4.81103	4.32257	4.18e-05	0.000344	1.706
TUBE1	-0.634978	2.28569	-4.32226	4.19e-05	0.000344	1.70492
CYP27C1	2.26328	2.59835	4.32219	4.19e-05	0.000344	1.70468
ZNF33A	-0.626972	4.13706	-4.32184	4.19e-05	0.000344	1.70346
INCENP	0.819303	5.39648	4.31908	4.24e-05	0.000347	1.69373
MT-CO1	-1.09022	12.4728	-4.31733	4.26e-05	0.00035	1.68759
ZC3H3	0.607022	5.20986	4.3159	4.29e-05	0.000351	1.68257
ANGPT2	1.39337	3.43197	4.31582	4.29e-05	0.000351	1.68229
HERPUD1	-0.724047	6.07278	-4.31071	4.37e-05	0.000358	1.66434
PANK1	-1.20142	2.18984	-4.31023	4.38e-05	0.000358	1.66265
GSN	-0.949787	8.78115	-4.31002	4.38e-05	0.000358	1.6619
MAP3K8	-1.12915	3.29325	-4.30987	4.38e-05	0.000358	1.66138
EFTUD2	0.522514	7.09264	4.30974	4.39e-05	0.000358	1.66091
PYROXD1	-0.662064	3.30779	-4.308	4.41e-05	0.00036	1.65483
RELT	1.08763	3.63127	4.30624	4.44e-05	0.000362	1.64865
GNE	-1.20153	3.96303	-4.30604	4.45e-05	0.000362	1.64794
TMEM139	-2.39919	-1.46596	-4.30486	4.47e-05	0.000364	1.64379
LRRC8A	1.02716	7.83426	4.30417	4.48e-05	0.000364	1.64139
NAALADL2	-2.11684	0.686783	-4.30355	4.49e-05	0.000365	1.6392
CD164L2	-2.07486	0.860131	-4.30045	4.54e-05	0.000369	1.62833
THTPA	-0.759275	1.85902	-4.30031	4.54e-05	0.000369	1.62783
IRAK1	0.676448	7.45755	4.29856	4.57e-05	0.000371	1.62169
KLF2	-1.30783	2.88602	-4.29678	4.6e-05	0.000374	1.61547
RIPK2	0.709299	4.31712	4.29636	4.61e-05	0.000374	1.614
SLC30A9	-0.503286	5.60075	-4.29524	4.63e-05	0.000375	1.61005
PRRC2C	0.69268	7.87125	4.29452	4.64e-05	0.000376	1.60755
MAMDC2	-1.94505	1.29881	-4.29404	4.65e-05	0.000376	1.60585
CHSY3	1.52391	1.40603	4.2939	4.65e-05	0.000376	1.60536
NCOA3	0.734882	6.46471	4.29387	4.65e-05	0.000376	1.60526
BAIAP2L1	0.822862	5.89445	4.2932	4.66e-05	0.000377	1.60291
SARM1	-1.34566	0.660109	-4.29024	4.71e-05	0.000381	1.59257
FHAD1	2.05709	0.795729	4.2887	4.74e-05	0.000383	1.58718
SVIL	-0.999267	6.88439	-4.28869	4.74e-05	0.000383	1.58714
N4BP2L2	-0.641741	4.93458	-4.28692	4.77e-05	0.000385	1.58093
CLCC1	-0.541904	3.60321	-4.2859	4.79e-05	0.000386	1.57735
PPP1R3F	-1.05407	1.5792	-4.28583	4.79e-05	0.000386	1.57711
TRAK1	-0.644963	6.02493	-4.28379	4.83e-05	0.000389	1.57
STX7	-0.490709	5.29604	-4.28347	4.83e-05	0.000389	1.56887
GET1	-0.746837	3.25087	-4.28281	4.85e-05	0.00039	1.56654
PCM1	-0.710149	6.18059	-4.28221	4.86e-05	0.00039	1.56447
BAZ2A	0.59103	7.02446	4.2815	4.87e-05	0.000391	1.56197
CYBC1	0.412269	5.4968	4.28142	4.87e-05	0.000391	1.5617
TMPRSS2	-3.74018	1.28569	-4.27899	4.91e-05	0.000394	1.55319
CEP131	0.690694	3.77141	4.27863	4.92e-05	0.000395	1.55196
SPAG16	-1.67137	2.24528	-4.27858	4.92e-05	0.000395	1.55176
EIF2D	-0.541194	5.35277	-4.27825	4.93e-05	0.000395	1.5506
FUCA2	0.623615	5.39943	4.27762	4.94e-05	0.000395	1.5484
SOGA1	0.792735	6.23822	4.27749	4.94e-05	0.000395	1.54798
CRYAB	-2.32344	5.74629	-4.27668	4.96e-05	0.000396	1.54514
ALDH3B1	-1.08904	3.25079	-4.27639	4.96e-05	0.000397	1.5441
PACRGL	-0.622369	2.58787	-4.27625	4.96e-05	0.000397	1.54363
PHYH	-1.43305	3.07694	-4.27594	4.97e-05	0.000397	1.54254
N4BP2L1	-1.33132	1.9123	-4.2739	5.01e-05	0.0004	1.53542
ODAM	-3.73205	-2.32591	-4.2736	5.01e-05	0.0004	1.53436
EMC3	-0.672804	5.52478	-4.27341	5.02e-05	0.0004	1.53372
FOXL1	2.02454	0.655674	4.27046	5.07e-05	0.000404	1.52341
LIPT1	-0.663653	1.33266	-4.27027	5.08e-05	0.000404	1.52274
LRIG1	-1.44889	4.34214	-4.27002	5.08e-05	0.000404	1.52189
VPS51	-0.534697	6.05752	-4.26987	5.08e-05	0.000404	1.52134
HEYL	1.49402	2.79374	4.26904	5.1e-05	0.000405	1.51847
NRIP2	-1.31546	0.0473825	-4.26876	5.1e-05	0.000405	1.51748
GYPC	-1.37748	2.75686	-4.267	5.14e-05	0.000408	1.51135
ACOT9	0.715495	4.83043	4.26683	5.14e-05	0.000408	1.51072
LOXL3	1.18286	1.85854	4.2664	5.15e-05	0.000408	1.50923
LRP8	1.3138	4.07465	4.26568	5.16e-05	0.000409	1.50672
PAQR4	0.887999	4.23295	4.26521	5.17e-05	0.00041	1.5051
SSRP1	0.523979	7.75846	4.2641	5.19e-05	0.000411	1.50121
RCOR3	-0.594493	4.22218	-4.26153	5.24e-05	0.000415	1.49227
RPS6KA4	0.926397	6.68385	4.25905	5.29e-05	0.000418	1.48363
C2	1.56584	3.67167	4.25852	5.3e-05	0.000419	1.48177
PDE12	-0.653559	4.66907	-4.258	5.31e-05	0.000419	1.47994
ATP5MG	-0.691874	6.59329	-4.25705	5.33e-05	0.000421	1.47665
SPTSSB	-2.77111	1.29789	-4.25694	5.33e-05	0.000421	1.47628
UGP2	-0.66894	6.56018	-4.25507	5.37e-05	0.000423	1.46973
FOXK2	0.466534	6.18796	4.25431	5.38e-05	0.000424	1.46711
FOXA1	-2.7425	1.50763	-4.25202	5.43e-05	0.000428	1.45912
TAP1	1.35088	7.8818	4.24836	5.5e-05	0.000433	1.4464
COQ7	-0.537047	3.72841	-4.24777	5.51e-05	0.000434	1.44434
SH3PXD2B	0.99382	6.30728	4.24748	5.52e-05	0.000434	1.44334
NDUFC1	-0.678479	4.97647	-4.24576	5.55e-05	0.000437	1.43733
CDK2	0.690926	5.05995	4.24532	5.56e-05	0.000437	1.4358
YWHAG	0.622191	8.3008	4.24381	5.59e-05	0.000439	1.43057
PCNX3	0.637742	6.46635	4.2425	5.62e-05	0.000441	1.42599
CTLA4	1.75578	1.00736	4.24221	5.63e-05	0.000441	1.42501
CD1C	-1.78521	0.376684	-4.24196	5.63e-05	0.000442	1.42414
PRDX2	-1.14871	6.94948	-4.24053	5.66e-05	0.000444	1.41917
CLGN	-2.17574	-1.53464	-4.23743	5.73e-05	0.000448	1.40839
NECTIN1	1.25677	8.987	4.23686	5.74e-05	0.000449	1.40641
CLIC5	-2.12905	0.478135	-4.23601	5.76e-05	0.00045	1.40347
TCIRG1	0.753572	5.70878	4.23581	5.76e-05	0.00045	1.40278
CLIC6	-2.2155	1.26057	-4.23575	5.76e-05	0.00045	1.40257
PBX1	-2.13034	4.3163	-4.23342	5.81e-05	0.000454	1.39448
ZNF91	-1.64261	2.09612	-4.23277	5.83e-05	0.000454	1.39221
KIF1C	-0.841639	7.6589	-4.23272	5.83e-05	0.000454	1.39206
FGF7	-2.39851	1.19451	-4.23256	5.83e-05	0.000454	1.39149
ACVR1	0.750029	5.34512	4.23153	5.85e-05	0.000456	1.38789
NEBL	-1.76917	5.07504	-4.23124	5.86e-05	0.000456	1.38689
UQCR11	-0.777311	5.33411	-4.23035	5.88e-05	0.000457	1.38382
PRPF4	0.741556	5.77727	4.22946	5.9e-05	0.000459	1.38072
SEMA4B	0.972302	8.13268	4.22884	5.91e-05	0.000459	1.37858
MTIF3	-0.732429	4.27103	-4.22847	5.92e-05	0.00046	1.37731
ISM1	-1.94619	1.75251	-4.22843	5.92e-05	0.00046	1.37714
COL24A1	1.68079	0.471265	4.22818	5.92e-05	0.00046	1.3763
CRAT	-1.83568	4.46035	-4.22815	5.92e-05	0.00046	1.37619
LRG1	-2.06067	4.09753	-4.22774	5.93e-05	0.00046	1.37478
STAT2	0.986238	6.81808	4.22488	6e-05	0.000465	1.36483
MICOS13	-0.805142	4.89277	-4.22479	6e-05	0.000465	1.36454
HSP90B1	0.639886	9.4614	4.22409	6.01e-05	0.000466	1.36209
SPNS1	0.694427	1.2922	4.22288	6.04e-05	0.000467	1.35791
BPHL	-0.629159	3.13883	-4.22241	6.05e-05	0.000468	1.3563
ENPEP	1.61961	2.54348	4.22136	6.07e-05	0.000469	1.35263
SPATA5	0.635539	3.44317	4.22116	6.08e-05	0.00047	1.35194
STRIT1	-2.69627	-2.98692	-4.21998	6.1e-05	0.000471	1.34787
LRRC27	-0.879899	1.1987	-4.21997	6.11e-05	0.000471	1.34781
B3GNT9	0.783836	3.9613	4.21821	6.14e-05	0.000474	1.34172
THY1	1.82037	5.64506	4.21807	6.15e-05	0.000474	1.34125
SKAP2	0.807375	4.73425	4.21743	6.16e-05	0.000475	1.33902
MAPRE1	0.476982	7.20264	4.21661	6.18e-05	0.000476	1.33619
IL17RB	-0.963513	0.55296	-4.21642	6.19e-05	0.000476	1.33552
SCG5	1.91965	0.674676	4.2164	6.19e-05	0.000476	1.33545
LRRC58	0.625215	5.92624	4.21584	6.2e-05	0.000476	1.33354
GALNT12	-1.57464	2.5526	-4.21563	6.2e-05	0.000477	1.33279
MCM3	0.721645	6.61162	4.21503	6.22e-05	0.000477	1.33074
CYP2U1	-1.17855	1.7033	-4.215	6.22e-05	0.000477	1.3306
SUPT16H	0.609779	7.12771	4.21459	6.23e-05	0.000478	1.3292
CASQ1	-3.26882	-1.32869	-4.2122	6.28e-05	0.000481	1.32094
NXPH3	-1.43231	-0.500234	-4.21213	6.28e-05	0.000481	1.32068
PRG4	-2.53985	-1.16336	-4.2108	6.31e-05	0.000483	1.31609
CCDC12	-0.709105	4.73267	-4.20921	6.35e-05	0.000486	1.31059
GNB1	0.453232	8.45083	4.20912	6.35e-05	0.000486	1.31028
PSMC3IP	0.937272	1.93139	4.20873	6.36e-05	0.000486	1.30894
ST6GALNAC1	-2.4827	2.61747	-4.20873	6.36e-05	0.000486	1.30892
RPL22	-0.542891	7.53458	-4.20835	6.37e-05	0.000486	1.30761
RALB	0.660331	6.71858	4.20822	6.37e-05	0.000486	1.30717
FMNL2	0.990262	5.92612	4.2072	6.4e-05	0.000488	1.30364
COX14	-0.701263	4.20944	-4.20686	6.41e-05	0.000488	1.30244
LSG1	0.54829	5.72536	4.20664	6.41e-05	0.000489	1.30168
CHMP6	-0.610049	4.22011	-4.20552	6.44e-05	0.00049	1.29782
ACTR3B	-0.863384	1.73132	-4.20516	6.45e-05	0.000491	1.29659
PHGDH	-1.63203	5.08702	-4.20393	6.47e-05	0.000493	1.29233
KRT33A	-2.25105	-2.2982	-4.20264	6.5e-05	0.000495	1.28786
PXDN	1.94422	5.96778	4.20038	6.56e-05	0.000498	1.28006
SLC27A1	-1.01551	3.73102	-4.19876	6.6e-05	0.000501	1.27447
ZIK1	-1.24845	0.252121	-4.19759	6.63e-05	0.000503	1.27044
ENPP5	-2.7284	-0.635637	-4.19659	6.65e-05	0.000505	1.26697
SMC6	0.641464	5.22683	4.19416	6.71e-05	0.000509	1.25861
PDCD4	-1.07126	6.52955	-4.1926	6.75e-05	0.000511	1.25322
SMARCD1	0.528065	6.03707	4.19195	6.76e-05	0.000512	1.25097
CENPH	0.868869	3.18338	4.19188	6.77e-05	0.000512	1.25075
PSMB2	0.613874	7.23051	4.1914	6.78e-05	0.000513	1.24907
JARID2	0.772002	5.92438	4.18991	6.81e-05	0.000515	1.24393
NFIB	-1.3076	5.22021	-4.1892	6.83e-05	0.000516	1.24149
STRIP2	1.51413	2.83597	4.18908	6.83e-05	0.000516	1.24109
USP54	-1.05478	4.44674	-4.189	6.84e-05	0.000516	1.24081
WDR76	0.915869	3.6891	4.18896	6.84e-05	0.000516	1.24065
RGS4	2.17591	1.84757	4.18832	6.85e-05	0.000517	1.23844
CTNNA3	-2.37936	-2.34453	-4.18617	6.91e-05	0.000521	1.23104
IL6ST	-0.858582	6.60091	-4.18526	6.93e-05	0.000522	1.22791
ARHGAP6	-1.3964	0.17457	-4.18428	6.96e-05	0.000524	1.22453
COL16A1	1.26399	6.47518	4.18263	7e-05	0.000527	1.21883
ESRRA	-0.553821	5.91444	-4.18239	7e-05	0.000527	1.21803
ARNTL2	1.29311	6.58725	4.18206	7.01e-05	0.000527	1.21689
TUBA1B	0.703869	8.16604	4.18145	7.03e-05	0.000528	1.21478
CCDC77	0.709447	2.93176	4.18089	7.04e-05	0.000529	1.21287
TIFA	-0.833943	3.85689	-4.18034	7.06e-05	0.00053	1.21097
CGREF1	-2.4794	0.857648	-4.1784	7.11e-05	0.000533	1.20428
ITPR1	-1.17382	3.81614	-4.17762	7.13e-05	0.000534	1.20158
SPACA9	-0.907666	2.52063	-4.17502	7.19e-05	0.000539	1.19265
CAVIN3	1.24766	3.91637	4.17409	7.22e-05	0.000541	1.18946
PPAT	0.808976	4.21673	4.17398	7.22e-05	0.000541	1.18909
MBLAC2	-0.801737	2.36937	-4.17353	7.23e-05	0.000541	1.18751
CBR4	-0.75978	3.65443	-4.17209	7.27e-05	0.000544	1.18256
BCAT1	1.91806	4.23542	4.17201	7.27e-05	0.000544	1.18228
CDR2L	1.09529	4.35186	4.17081	7.3e-05	0.000546	1.17819
C1orf115	-1.49744	2.73823	-4.17033	7.32e-05	0.000547	1.17653
SUOX	-1.00709	3.6779	-4.1696	7.34e-05	0.000548	1.17402
HSPH1	0.980102	7.6897	4.16901	7.35e-05	0.000549	1.172
ARRB1	-1.19761	3.14929	-4.1684	7.37e-05	0.000549	1.16988
TMSB10	0.888041	9.87944	4.16751	7.39e-05	0.00055	1.16684
NCOA1	-0.806659	5.51509	-4.16751	7.39e-05	0.00055	1.16682
ABCD1	1.0668	3.98111	4.16751	7.39e-05	0.00055	1.16682
SHOC1	1.66006	0.170708	4.16716	7.4e-05	0.000551	1.16563
TNS4	1.4175	8.36739	4.16705	7.41e-05	0.000551	1.16526
SIAH1	0.740176	4.04781	4.16483	7.47e-05	0.000555	1.15761
PDHA1	-0.547521	5.8985	-4.16444	7.48e-05	0.000555	1.15629
LAMB1	1.06162	7.21977	4.16422	7.48e-05	0.000555	1.15552
SMCO1	-1.90105	-2.94703	-4.16412	7.48e-05	0.000555	1.15518
RHOU	-1.37364	2.7269	-4.16191	7.55e-05	0.00056	1.14759
FBXW4	-0.669476	5.21032	-4.16179	7.55e-05	0.00056	1.14718
ASB9	-1.09545	-0.139468	-4.16052	7.58e-05	0.000562	1.14281
PEX1	-0.700142	3.75237	-4.15909	7.62e-05	0.000565	1.13792
PPP1R9B	0.539579	6.60371	4.15891	7.63e-05	0.000565	1.13729
ECH1	-0.805805	6.46567	-4.15706	7.68e-05	0.000568	1.13095
FOLR1	-3.21177	-1.28369	-4.15671	7.69e-05	0.000569	1.12976
TTC21A	-0.993923	0.0711346	-4.15636	7.7e-05	0.000569	1.12853
OSR2	1.36071	3.15416	4.15583	7.71e-05	0.00057	1.12674
C11orf54	-0.813749	3.37557	-4.15539	7.73e-05	0.00057	1.12523
PALMD	-1.26838	5.2673	-4.15539	7.73e-05	0.00057	1.12522
USP19	-0.515801	5.60101	-4.15515	7.73e-05	0.00057	1.12439
SRPK2	0.717815	5.80199	4.15257	7.81e-05	0.000575	1.11554
C4orf19	-2.58441	-0.279455	-4.15219	7.82e-05	0.000576	1.11425
TMEM185B	0.589804	5.00733	4.15134	7.84e-05	0.000577	1.11135
NEDD1	0.622341	4.66272	4.14846	7.92e-05	0.000583	1.10146
GMNN	0.81799	3.97352	4.14816	7.93e-05	0.000583	1.10043
CLCN7	0.482992	5.67406	4.14794	7.94e-05	0.000584	1.09967
DDIAS	1.17877	3.1795	4.14722	7.96e-05	0.000585	1.09721
ATP5PB	-0.573318	6.96464	-4.14717	7.96e-05	0.000585	1.09704
SUZ12	0.510359	5.29662	4.14697	7.97e-05	0.000585	1.09638
PLS3	0.763294	7.35953	4.14474	8.03e-05	0.000589	1.08874
EMILIN2	1.18204	4.04789	4.14415	8.05e-05	0.00059	1.08672
FBXO40	-2.49074	-2.94264	-4.14315	8.08e-05	0.000592	1.0833
PDSS2	-0.442879	3.90352	-4.14304	8.08e-05	0.000592	1.08292
CHST7	1.34269	2.16108	4.14288	8.08e-05	0.000592	1.08235
NDUFB8	-0.657718	4.47994	-4.14262	8.09e-05	0.000592	1.08147
WSCD1	-1.53278	-0.491798	-4.14237	8.1e-05	0.000592	1.08063
SLC25A6	-0.725652	8.66402	-4.14221	8.1e-05	0.000592	1.08006
PLAAT1	-2.35849	-0.767429	-4.14166	8.12e-05	0.000593	1.0782
PCED1B	0.986062	2.53985	4.13829	8.22e-05	0.0006	1.06667
CFAP410	-0.825168	3.00164	-4.13702	8.26e-05	0.000603	1.06232
GGT6	-2.17348	4.14736	-4.13686	8.26e-05	0.000603	1.06178
KDM5A	0.512472	6.21613	4.13646	8.27e-05	0.000603	1.06041
UBR5	0.54051	7.01684	4.13608	8.29e-05	0.000604	1.05911
RTL5	-1.45402	0.759574	-4.13524	8.31e-05	0.000605	1.05623
SEMA4F	1.0249	3.16746	4.1338	8.35e-05	0.000608	1.05132
CCNE2	1.15575	1.99516	4.1334	8.37e-05	0.000609	1.04993
DLX6	2.44723	-0.405941	4.13317	8.37e-05	0.000609	1.04915
RPL26	-0.671022	7.73604	-4.13249	8.39e-05	0.00061	1.04681
CLTC	0.502621	8.88978	4.13195	8.41e-05	0.000611	1.045
PATL1	0.596169	6.13198	4.13145	8.43e-05	0.000612	1.04326
ZBTB18	-1.0406	3.16301	-4.12905	8.5e-05	0.000617	1.03507
FAM111B	1.32605	3.81786	4.12488	8.63e-05	0.000626	1.02086
HSPB8	-1.72644	5.73886	-4.1235	8.67e-05	0.000629	1.01612
TC2N	-1.40648	4.73208	-4.12275	8.7e-05	0.00063	1.01358
C11orf71	-1.19451	1.67948	-4.12144	8.74e-05	0.000633	1.00911
C1orf216	0.782426	3.46714	4.12117	8.75e-05	0.000633	1.00818
OLFML2B	1.76949	4.71761	4.11934	8.8e-05	0.000637	1.00194
PKP1	1.80715	10.584	4.11823	8.84e-05	0.000639	0.998146
TRIP10	-0.897789	5.95953	-4.11756	8.86e-05	0.00064	0.995888
HNRNPA2B1	0.420175	9.22429	4.11699	8.88e-05	0.000641	0.993939
MDFI	1.10119	5.9155	4.11662	8.89e-05	0.000642	0.992683
ZFP28	-1.83696	0.370718	-4.11397	8.98e-05	0.000648	0.983634
WASHC5	0.457761	5.94609	4.11285	9.01e-05	0.00065	0.979822
RSPO3	-2.01783	-0.0375923	-4.10897	9.14e-05	0.000659	0.966608
ANO5	-2.67933	-1.15607	-4.10824	9.16e-05	0.00066	0.964127
ABRA	-2.28622	-3.00947	-4.10748	9.19e-05	0.000662	0.961547
AFF3	-1.80335	-0.590877	-4.10666	9.22e-05	0.000663	0.958757
TNS2	-1.10743	4.25119	-4.10628	9.23e-05	0.000664	0.957458
POLE	0.697469	5.37745	4.10573	9.25e-05	0.000665	0.955589
PCMTD1	-0.696546	5.12344	-4.10481	9.28e-05	0.000667	0.952465
RNFT1	-0.557609	2.6334	-4.10331	9.33e-05	0.00067	0.947331
PEX3	-0.715413	3.90388	-4.10317	9.33e-05	0.00067	0.946887
IPP	-0.544411	3.19441	-4.1029	9.34e-05	0.00067	0.945967
CH25H	-1.80212	1.86348	-4.10273	9.35e-05	0.000671	0.945358
PI4K2A	0.61428	5.60277	4.10157	9.39e-05	0.000673	0.94144
SCNN1A	-2.1447	5.51577	-4.10147	9.39e-05	0.000673	0.941083
SLC7A11	2.51076	4.7651	4.10119	9.4e-05	0.000673	0.940148
IMPDH1	0.942437	6.2665	4.10113	9.4e-05	0.000673	0.939933
CRACR2B	-1.83865	1.24686	-4.09803	9.51e-05	0.00068	0.929391
FOLR3	2.57875	-0.290416	4.09742	9.53e-05	0.000681	0.927328
SP100	0.763291	6.08924	4.09603	9.58e-05	0.000685	0.922611
TMEM9B	-0.571718	5.74296	-4.09442	9.63e-05	0.000688	0.917142
F8	-1.05863	2.24277	-4.09395	9.65e-05	0.000689	0.915528
SNX8	0.610428	5.11088	4.09384	9.65e-05	0.000689	0.915152
RPL34	-0.745773	8.08938	-4.09287	9.68e-05	0.000691	0.911864
MARCHF2	-0.692154	4.23099	-4.09271	9.69e-05	0.000691	0.911337
PEX7	-0.6376	2.57254	-4.09171	9.73e-05	0.000693	0.907942
HTATIP2	0.764543	5.91914	4.09159	9.73e-05	0.000693	0.907508
GTF2E1	0.539325	3.80447	4.08832	9.84e-05	0.000701	0.896415
CD70	2.05812	0.440403	4.08829	9.85e-05	0.000701	0.896307
CEP72	0.987788	2.31195	4.08701	9.89e-05	0.000703	0.891973
[truncated: 12,214 more rows]
